# Supplementary material for: Access to medicines by child refugees in the East Midlands region of England: a cross-sectional study
Source: PubMed Central journal article supplement — BMJ Open. 2014 Dec 18;4(12):e006421. doi: 10.1136/bmjopen-2014-006421 (PMC4275676; doi:10.1136/bmjopen-2014-006421), 2014-12-18
Supplement: bmjopen-2014-006421.draft_revisions.pdf [file bmjopen-2014-006421.draft_revisions.pdf]

# BMJ Open

## Access to medicines by child refugees in the East Midlands region of England – a cross-sectional study

|                                 |                                                                                                                                                                                                                                                                                                                                                                                                                   |
|---------------------------------|-------------------------------------------------------------------------------------------------------------------------------------------------------------------------------------------------------------------------------------------------------------------------------------------------------------------------------------------------------------------------------------------------------------------|
| Journal:                        | <i>BMJ Open</i>                                                                                                                                                                                                                                                                                                                                                                                                   |
| Manuscript ID:                  | bmjopen-2014-006421                                                                                                                                                                                                                                                                                                                                                                                               |
| Article Type:                   | Research                                                                                                                                                                                                                                                                                                                                                                                                          |
| Date Submitted by the Author:   | 21-Aug-2014                                                                                                                                                                                                                                                                                                                                                                                                       |
| Complete List of Authors:       | Alkhatani, Saad; University of Nottingham, child Health<br>Cherrill, Janine; University of Nottingham, child Health<br>Millward, Claire; Derbyshire Childrens Hospital, Clinical Psychology<br>Grayson, Keith; Refugee Action,<br>Hilliam, Rachel; Open University,<br>Sammons, Helen; University of Nottingham, child Health<br>Choonara, Imti; Derbyshire Childrens Hospital, Academic Division of Child Health |
| <b>Primary Subject Heading</b>: | Paediatrics                                                                                                                                                                                                                                                                                                                                                                                                       |
| Secondary Subject Heading:      | Pharmacology and therapeutics, Health services research, Health policy, Global health                                                                                                                                                                                                                                                                                                                             |
| Keywords:                       | Health policy < HEALTH SERVICES ADMINISTRATION & MANAGEMENT, Rationing < HEALTH SERVICES ADMINISTRATION & MANAGEMENT, PRIMARY CARE                                                                                                                                                                                                                                                                                |
|                                 |                                                                                                                                                                                                                                                                                                                                                                                                                   |

SCHOLARONE™  
Manuscripts

only

1  
2  
3 **Access to medicines by child refugees in the East Midlands region of**  
4 **England – a cross-sectional study**  
5

6 Alkahtani S<sup>1</sup>, Cherrill J<sup>1</sup>, Millward C<sup>2</sup>, Grayson K<sup>3</sup>, Hilliam R<sup>4</sup>, Sammons H<sup>1</sup>, Choonara I<sup>1</sup>  
7  
8

9  
10 <sup>1</sup>Academic Division of Child Health, University of Nottingham, Derbyshire Children's Hospital, Derby  
11 UK  
12

13  
14 <sup>2</sup>Department of Clinical Psychology, Derbyshire Children's Hospital, Derby UK  
15  
16

17  
18 <sup>3</sup>Refugee Action, Chancery House, 7 Millstone Lane, Leicester, LE1 5JN, UK  
19

20 <sup>4</sup>Statistics Lecturer, The Open University, Walton Hall, Milton Keynes, MK7 6AA, UK  
21  
22

23  
24  
25  
26 Corresponding author

27 Imti Choonara

28 Emeritus Professor in Child Health

29 Academic Division of Child Health

30 The Medical School

31 University of Nottingham

32 Derbyshire Children's Hospital

33 Uttoxeter Road

34 Derby DE22 3DT  
35  
36  
37  
38  
39  
40  
41  
42  
43  
44  
45  
46  
47  
48  
49  
50  
51  
52  
53  
54  
55  
56  
57  
58  
59  
60

## Abstract

*Objectives:* To explore access to health care and drug therapy by refugee children in the East Midlands region of England.

*Design:* Interviews with refugees with children and a control group of British parents with children.

*Setting:* East Midlands region of England

*Participants:* 50 refugees with children and a control group of 50 parents with children.

*Main outcome measures:* Number of medicines used by children in the last month and the last six months. Health of parents and children. Registration with a GP.

*Results:* Refugee parents were more likely to have ill health than control parents (18v5,  $p=0.002$ ). All families in both groups were registered with a GP. There was no difference in the number of children in the two groups experiencing illnesses. In the last month, 30 refugee children received 60 medicines and 31 control children 63 medicines. In the last 6 months, 48 refugee children received 108 medicines and 43 control children 96 medicines. There was no difference between the two groups of children in relation to the likelihood of receiving any medicines in either the last month ( $P=0.839$ ) or the last 6 months ( $P=0.081$ ). Children in the refugee group were more likely to receive prescribed medicines for both the last month ( $p=0.008$ ) and the last six months ( $p<0.001$ ). They were also less likely to receive OTC medicines in the last 6 months ( $P=0.009$ ).

*Conclusions:* Refugee children in the East Midlands have access to health care, medicines and a family doctor. They are more likely to receive prescribed medicines and less likely to receive OTC medicines.

**Keywords:** access, medicines, refugees, OTC medicines

### Article Summary:

#### *Article Focus*

- Adult refugees are likely to experience problems in accessing healthcare in the UK
- Refugee children are a vulnerable group of children who may have difficulties experiencing healthcare
- There may be a link between access to healthcare and the number of medicines received by children

1  
2  
3  
4  
5 *Key Messages*

- 6
- 7 • Refugee children in the East Midlands of England were immunised and registered  
8 with a GP
  - 9
  - 10 • Refugee children receive the same number of overall medicines as control children
  - 11
  - 12 • Refugee children were less likely to receive over the counter medicines and more  
13 likely to receive prescribed medicines
  - 14

15  
16  
17 *Strengths and limitations of this study*

- 18
- 19 • This study shows that it is possible to use the number of medicines used by children  
20 as a marker of access to healthcare
  - 21
  - 22 • The refugee families included in the study had all made contact with a charity dealing  
23 with refugees and may therefore experience better healthcare than others
  - 24
  - 25
  - 26
  - 27
  - 28
  - 29
  - 30
  - 31
  - 32
  - 33
  - 34
  - 35
  - 36
  - 37
  - 38
  - 39
  - 40
  - 41
  - 42
  - 43
  - 44
  - 45
  - 46
  - 47
  - 48
  - 49
  - 50
  - 51
  - 52
  - 53
  - 54
  - 55
  - 56
  - 57
  - 58
  - 59
  - 60

## Introduction

Children have the right to access health care and receive medicines that are scientifically evaluated for both efficacy and safety. Research has mainly focused on clinical trials that have evaluated efficacy. Access is an area that has been inadequately explored [1]. Problems with access to health care and medicines are well recognised in low and lower middle income countries. More recent research in North America has revealed that in both the United States and Canada, children of different ethnic groups or without insurance may be less likely to receive medicines [2-5].

Refugee children are a highly vulnerable group of children who are less likely to receive full access to medicines and health care [6]. Adult refugees are likely to experience significant problems in accessing health care and medical treatment [6-8]. There have been relatively few studies looking at access to health care for refugee children in the UK and to date there have been no studies in the UK on whether these children receive satisfactory drug therapy. We have used the term 'refugees' to include both those who have been awarded refugee status and those seeking asylum. The aim was to explore access to health care and drug therapy in this vulnerable group of children.

## Methods

Ethical approval was obtained from the University of Nottingham Medical School Research Ethics Committee (Reference G/6/2010). Initial contact with both asylum seekers and refugees was made by Refugee Action (Nottingham branch). Parents, who Refugee Action staff identified as possibly being interested in participating in the research, were approached by the research investigators (SA and JC). Parents who then agreed to take part in the study were interviewed within a private room in the offices provided by Refugee Action in Nottingham. If the participants did not speak/understand English/Arabic, then an interpreting service was used. Additional interviews were performed at a refugee drop in centre and a Muslim community centre in Derby. The interview involved collecting the following data, using a questionnaire (see supplementary Table 1).

- a) demographic data regarding age and number of children
- b) data regarding health of the family, children, registration with the GP and immunisation status of the children
- c) whether any of the children had been ill in the last month and if they had received any medicines, if so, from whom
- d) similar questions regarding illness and number of medicines for the last six months

The interviews were performed between November 2010 and November 2011.

A control group of parents were obtained in a local shopping centre. Random parents with children were approached by the investigators and if consent was given, the interview was performed within

1  
2  
3 the shopping centre. Interviews with the control group of parents were performed between November  
4 2011 and January 2012.  
5  
6

7 Statistical analysis was performed by using the Mann Whitney test for demographic data. The Chi-  
8 Squared test was used to compare the number of children with illnesses, number of illnesses, number  
9 of medicines (both prescribed and OTC). It was not possible to perform a power calculation to  
10 determine the sample size as there was insufficient information available regarding the number of  
11 medicines used by children in the UK. It was therefore decided to aim for 50 parents in each group.  
12 This was a pragmatic decision based on discussions with Refugee Action. The research was  
13 performed as a pilot study in order to test the feasibility of parents recalling such information and in  
14 order to obtain pharmacoepidemiological data that would be useful for power calculations for  
15 subsequent national studies.  
16  
17  
18  
19

## 20 21 22 **Results** 23

24  
25 Sixty six parents of children who were refugees/asylum seekers were invited to participate. Sixteen  
26 declined (reasons not given for declining), i.e. 50 agreed to participate. Thirty eight of the 50 parents  
27 who agreed to participate were male. Most refugees were from Iraq, Pakistan, Afghanistan and  
28 Nigeria. The median age of the parents was 36 years (range 24-58 years) and all were born outside  
29 the UK. They had lived in the UK for a median of 6.25 years. Eighteen had been awarded refugee  
30 status. One parent had been refused refugee status and was lodging an appeal. The remaining 31  
31 were seeking asylum but their cases had not been heard as yet. Eighteen parents reported that they  
32 had a chronic illness (four chronic back pain, four depression, two diabetes, two disabilities and six  
33 other illnesses). Eighteen parents were employed, five did not state their occupation and 27 were  
34 unemployed (Table 1).  
35  
36  
37  
38  
39

40 The control group consisted of 50 parents of whom 44 were female. Twenty one parents declined to  
41 participate in the study. Their ages ranged from 19 to 46 years with a median age of 34.5 years.  
42 Most of the parents were fit and well but five reported health problems (three asthma and two  
43 depression/stress). Twenty six of the control parents were employed. As expected, the control group  
44 of parents had lived in the current locality for a longer period (17.5 vs 4.75 median years). Refugee  
45 parents were more likely to have health problems.  
46  
47  
48  
49  
50

51  
52  
53  
54  
55  
56 *Access to health care and medicines*  
57  
58  
59  
60

1  
2  
3  
4 All families were registered with a GP. There was no significant difference in the number of days  
5 since the last visit to the GP (14 vs 15 days, refugees vs control). All but one of the refugee parents  
6 and all but five of the control group families had visited the GP in the past six months.  
7  
8

9  
10 There was a significant difference ( $p=0.008$ ) in that nine of the refugee parents stated that they had  
11 experienced difficulties visiting the GP in relation to affording the travel costs and language problems.  
12 None of the control group parents stated they had any difficulties.  
13

#### 14 15 16 17 *Children's health*

18  
19 There were 117 children in the refugee group and 99 in the control group. The median number of  
20 children per family was two in both groups ( $p=0.22$ ). The median ages of the children were five and  
21 four years respectively (refugees vs control). The interquartile ranges for ages of the children were  
22 2.25-8 and 1.9-8 years respectively in the two groups and there was no significant difference in the  
23 ages ( $p=0.13$ ). All but one child in the refugee group were immunised. Four children in the refugee  
24 group had chronic medical problems (congenital heart disease, asthma, cancer and poor growth).  
25 Seven children in the control group had chronic medical problems (asthma (4), epilepsy, ADHD and  
26 arthritis).  
27  
28

29  
30  
31  
32 There were 29 refugee families and 30 control families with an ill child in the last month. In the last  
33 month 30 refugee children received 60 medicines and 31 control children received 63 medicines  
34 (Table 2 ). The majority of the medicines for refugee children were prescribed (41 out of 60). In  
35 contrast, the majority of medicines for control children were OTC medicines (37 out of 63).  
36  
37

38  
39 In the last 6 months, all 50 refugee families and 45 control families had an ill child. In the last 6  
40 months, 48 refugee children received 108 medicines and 43 control children received 96 medicines  
41 (Table 3). The majority of the medicines for refugee children were prescribed (83 out of 108). In  
42 contrast, the majority of the medicines for control children were OTC Medicines (52 out of 96).  
43  
44

45  
46  
47 There was no difference between the two groups of children in relation to the likelihood of receiving  
48 any medicines in either the last month ( $P=0.839$ ) or the last 6 months ( $P=0.081$ ). Children in the  
49 refugee group were more likely to receive prescribed medicines for both the last month ( $p=0.008$ ) and  
50 the last six months ( $p<0.001$ ). They were also less likely to receive OTC medicines in the last 6  
51 months ( $P=0.009$ ). Analgesics/anti-pyretics were the most frequently used medicines in both the last  
52 month and the last six months (Table 2).  
53  
54  
55  
56  
57  
58  
59  
60

## Discussion

Child refugees were similar to the control group of children in relation to the presence of chronic medical problems and immunisation status. The main aim of this study was to compare the number of medicines used by refugee children in comparison with control children. It was reassuring to see that the total number of medicines used by both groups of children in both the past month and the past six months was similar. Alongside the fact that all families were registered with a GP suggests that refugee parents are managing to access health care and ensure that their children receive adequate treatment. Refugee children were, however, less likely to receive over the counter (OTC) medicines and more likely to receive prescribed medicines than control children.

A study in Dutch adolescents demonstrated that a higher socioeconomic status was associated with an increase in OTC drug use [9]. Similar findings were reported in German children and adolescents [10]. A study in the UK identified that the cost of OTCs affected only the most deprived sections of the population [11]. Refugees face considerable financial difficulties in that asylum seekers are not allowed to work and receive significantly less financial assistance than others on welfare benefits [12]. Analgesics/antipyretics are the most frequently purchased OTC medicines by parents for children in the UK [11]. The two most common reasons for buying OTC medicines by British parents included; 1) not wishing to bother a GP for minor illness and 2) to have a medicine in case of future need [11]. It is likely that the lower OTC use in refugee children is related to the financial cost of OTC medicines.

Adult refugees were more likely to have health problems than the control parents in this study. This is in keeping with previous studies as refugees often come from countries affected by armed conflict and are likely to have experienced bereavement, displacement or torture [12]. It is important to recognise that there are many differences in refugees worldwide and that the health problems of refugees from the Middle East in the UK are likely to be different to those of South-East Asian refugees in Canada [13].

There have been very few studies looking at access to health care by refugee children [14, 15]. Additionally, there have been no previous studies specifically looking at the pharmacoepidemiology of medicines received by refugee children. Our small study shows that it is possible to use both the number of medicines used by children over the last month or the last six months as a marker of access to health care. It is important to recognise the limitations of our study. Firstly, most of the refugees interviewed had been in contact with Refugee Action. These were refugees who had made contact with a charity and were therefore fully informed of their rights, especially with regards to health care. Unfortunately, due to government cutbacks, the Nottingham office of Refugee Action has now closed down and the nearest Refugee Action office is in Leicester, which is 40 km away. Although



1  
2  
3 From April 2014 Refugee Action no longer has a grant agreement with the Home Office to provide  
4 advice and support (formally One Stop Shop) to individuals and families going through the asylum  
5 system. This work is now provided through another agency; Migrant Help. Migrant Help services are  
6 split into Asylum Support Applications UK and Asylum Advice UK and are provided across the UK  
7 mainly through a national telephone service with some limited outreach (for the East Midlands in  
8 Derby, Nottingham and Leicester one day per week respectively). Refugee Action continue to provide  
9 a national Assisted Voluntary Returns project; Choices. A project for vulnerable destitute women in  
10 Leicester; Fresh Start and a volunteer run project for vulnerable people; Prevention of Asylum  
11 Homelessness which helps people to appeal refusals of support under s4 of the Immigration and  
12 Asylum Act 1999, It is also likely that if we had looked at a different group of children, for example  
13 refugee children presenting to the Emergency Department, our findings may have been different. A  
14 small study in Ireland of 25 refugees found that 20% of refugees were not registered with a GP [15].  
15 Additionally, we did not look at the access to health care and medicines of refugee children held in  
16 immigration detention centres. Others have highlighted that these children experience significant  
17 health problems [16]. It was not possible to match controls and refugee parents by socio economic  
18 status. This is impossible in the UK as asylum seekers receive less financial support than others on  
19 welfare benefit [12]. It is important to recognise that the number of people seeking refugee status in  
20 the UK is actually quite low (less than 20,000 in 2011) [17]. Unfortunately, the main political parties  
21 and a large section of the media wishes to restrict access to health care for both refugees and  
22 economic migrants [18]. It is likely, therefore, that in the future refugee children in the UK will  
23 experience more difficulties in accessing both health care and medicines.  
24  
25  
26  
27  
28  
29  
30  
31

### 32 33 **Contributors**

34 IC conceived the original idea and study design. This was modified following discussion with  
35 SA,CM,HS,RH and KG. SA and JC performed the interviews and collected all the data. KG helped  
36 facilitate the collection of the data. Data was analysed by IC,RH,SA,JC,HS and KG. All authors  
37 contributed to the writing of the paper and approved the final manuscript.  
38  
39  
40

41 Competing interests

42 None  
43  
44  
45

### 46 **Funding**

47 This research received no specific grant from any funding agency in the public, commercial or not for  
48 profit sectors.  
49  
50

51 Data sharing

52 No additional data available  
53  
54  
55  
56  
57  
58  
59  
60

**Table 1** Sociodemographics of parents

|                                      | <b>Refugee</b> | <b>Control</b> | <b>p-value</b> |
|--------------------------------------|----------------|----------------|----------------|
| Median age (y)                       | 36             | 34.5           | 0.12           |
| Male                                 | 38             | 6              | <0.001         |
| Ill health                           | 18             | 5              | 0.002          |
| Employed                             | 18             | 26             | 0.24           |
| No of years in current accommodation | 2.3            | 7.4            | <0.001         |
| No of years in current locality      | 4.8            | 17.5           | < 0.001        |

**Table 2** Medicines used in the last month

| Medicines          | Refugee    |           |           | Control    |           |           |
|--------------------|------------|-----------|-----------|------------|-----------|-----------|
|                    | Prescribed | OTC       | Total     | Prescribed | OTC       | Total     |
| Paracetamol        | 20         | 2         | <b>22</b> | 10         | 14        | <b>24</b> |
| Ibuprofen          | 2          | 0         | <b>2</b>  | 2          | 6         | <b>8</b>  |
| Antibiotics        | 7          | 0         | <b>7</b>  | 6          | 0         | <b>6</b>  |
| Inhalers           | 3          | 0         | <b>3</b>  | 5          | 0         | <b>5</b>  |
| Cough suppressants | 1          | 2         | <b>3</b>  | 3          | 1         | <b>4</b>  |
| Topical            | 0          | 0         | <b>0</b>  | 0          | 1         | <b>1</b>  |
| Vitamins           | 1          | 2         | <b>3</b>  | 0          | 10        | <b>10</b> |
| Teething medicines | 0          | 0         | <b>0</b>  | 0          | 3         | <b>3</b>  |
| Lactulose          | 2          | 0         | <b>2</b>  | 0          | 0         | <b>0</b>  |
| Honey              | 0          | 8         | <b>8</b>  | 0          | 0         | <b>0</b>  |
| Herbal             | 0          | 4         | <b>4</b>  | 0          | 1         | <b>1</b>  |
| Others             | 3          | 1         | <b>4</b>  | 0          | 1         | <b>1</b>  |
| Unknown            | 2          | 0         | <b>2</b>  | 0          | 0         | <b>0</b>  |
| <b>Total</b>       | <b>41</b>  | <b>19</b> | <b>60</b> | <b>26</b>  | <b>37</b> | <b>63</b> |

**Table 3** Medicines used in the last 6 months

| Medicines          | Refugee    |           |            | Control    |           |           |
|--------------------|------------|-----------|------------|------------|-----------|-----------|
|                    | Prescribed | OTC       | Total      | Prescribed | OTC       | Total     |
| Paracetamol        | 39         | 4         | <b>43</b>  | 19         | 23        | <b>42</b> |
| Ibuprofen          | 2          | 0         | <b>2</b>   | 2          | 10        | <b>12</b> |
| Antibiotics        | 10         | 0         | <b>10</b>  | 10         | 0         | <b>10</b> |
| Inhalers           | 4          | 0         | <b>4</b>   | 5          | 0         | <b>5</b>  |
| Cough suppressants | 6          | 2         | <b>8</b>   | 4          | 2         | <b>6</b>  |
| Topical            | 8          | 0         | <b>8</b>   | 2          | 1         | <b>3</b>  |
| Vitamins           | 2          | 2         | <b>4</b>   | 0          | 10        | <b>10</b> |
| Teething medicines | 0          | 1         | <b>1</b>   | 0          | 4         | <b>4</b>  |
| Lactulose          | 2          | 0         | <b>2</b>   | 0          | 0         | <b>0</b>  |
| Oral Rehydration   | 1          | 0         | <b>1</b>   | 2          | 1         | <b>3</b>  |
| Honey              | 0          | 8         | <b>8</b>   | 0          | 0         | <b>0</b>  |
| Herbal             | 0          | 5         | <b>5</b>   | 0          | 1         | <b>1</b>  |
| Others             | 2          | 3         | <b>5</b>   | 0          | 0         | <b>0</b>  |
| Unknown            | 4          | 0         | <b>4</b>   | 0          | 0         | <b>0</b>  |
| Iron               | 3          | 0         | <b>3</b>   | 0          | 0         | <b>0</b>  |
| <b>Total</b>       | <b>83</b>  | <b>25</b> | <b>108</b> | <b>44</b>  | <b>52</b> | <b>96</b> |

**References**

1. Berkovitch M, Choonara I, Jacqz-Aigrain E et al. Improving research and access to children's medicines worldwide. *Paed Perinat Drug Ther* 2008; 8: 138-139
2. Pletcher M J, Kertesz S G, Kohn M A, Gonzales R. Trends in opioids prescribing by race/ethnicity for patients seeking care in US emergency departments. *JAMA* 2008; 299: 70-78.
3. Yen K, Kim M, Stremski E S, Gorelick M H. Effect of ethnicity and race on the use of pain medications in children with long bone fractures in the emergency department. *Ann Emerg Med* 2003; 42: 41-47.
4. Chen A Y, Chang R K R. Factors associated with prescription drug expenditures among children: an analysis of the medical expenditure panel survey. *Pediatrics* 2002; 109: 728-732.
5. Reime B, Tu A W, Lee S K, Canadian Neonatal Network. Treatment differences between Aboriginal and white infants admitted to Canadian neonatal intensive care units. *Paed Perinat Epidemiol* 2007; 21: 532-540.
6. Royal College of Paediatrics and Child Health. *Inequalities in child health*, 1998.
7. Arnold FW. Seeking medical justice. *BMJ* 2008; 336: 683-684.
8. Reeves M, de Wildt G, Murshali H et al. Access to health care for people seeking asylum in the UK. *B J Gen Pract* 2006; 56: 306-308.
9. Tobi H, Meijer WM, Tunistra J, de Jong-van den Berg LTW. Socio-economic differences in prescription and OTC drug use in Dutch adolescents. *Pharm World Sci* 2003; 25: 203-206.
10. Du Y, Knopf H. Self-medication among children and adolescents in Germany: results of the National Health Survey for Children and Adolescents (KiGGS). *Br Clin Pharmacol* 2009; 68: 599-608.
11. McIntyre J, Conroy S, Collier J et al. Use of over-the-counter medicines in children. *Int J Pharm Pract* 2003; 11: 209-215.

- 1  
2  
3 12. Taylor K. Asylum seekers, refugees, and the politics of access to health care: a UK  
4 perspective. *Br J Gen Pract* 2009; 59: 765-772.  
5  
6
- 7  
8 13. Fung K, Wong Y-LR. Factors influencing attitudes towards seeking professional help among  
9 East and Southeast Asian immigrant and refugee women. *Int J Soc Psychiatry* 2007; 53:  
10 216-231.  
11
- 12  
13 14. Davidson N, Skull S, Burgner D et al. An issue of access: delivering equitable health care for  
14 newly arrived refugee children in Australia. *J Paediatr Child Health* 2004; 40: 569-575.  
15  
16
- 17  
18 15. Prendiville T, Williamson M, Cahill P, Loftus BG. Access of asylum seeker children to acute  
19 paediatric services. *Ir Med J* 2007; 100: 362-363.  
20  
21
- 22  
23 16. Lorek A, Ehntholt K, Nesbitt A et al. The mental and physical health difficulties of children  
24 held within a British immigration detention center: a pilot study. *Child Abuse Neglect* 2009; 33:  
25 573-585.  
26  
27
- 28  
29 17. Blinder S. Briefing: Migration to the UK: Asylum, published 13/02/2013.  
30 [www.migrationobservatory.ox.ac.uk](http://www.migrationobservatory.ox.ac.uk) (accessed 12 March 2013)  
31  
32
- 33  
34 18. Delamothe T. Migrant healthcare: public health versus politics. *BMJ* 2012; 344: e924.  
35  
36  
37  
38  
39  
40  
41  
42  
43  
44  
45  
46  
47  
48  
49  
50  
51  
52  
53  
54  
55  
56  
57  
58  
59  
60

**Children’s Access to Medicines in the East Midlands  
Parental interview**

**A. BACKGROUND**

Age (years): ..... Male / Female

No. of adults living in the home: .....

No. of children: .....

Age of children: .....

Occupation: .....

Country of birth: .....

*If applicable*

Country left: .....

Reasons for leaving: .....

Date of entry to the UK: .....

Have you had a decision on your asylum claim: .....

Duration of time in present accommodation: .....

Duration of time in current locality: .....

Contacts in current locality: .....

Links with community:  
.....

**B. HEALTH**

Are you registered with a GP?

Yes  No

If no, why is that?  
.....

Date of last visit to GP: .....

Are you well?

Yes  No

1  
2  
3  
4  
5  
6  
7  
8  
9  
10  
11  
12  
13  
14  
15  
16  
17  
18  
19  
20  
21  
22  
23  
24  
25  
26  
27  
28  
29  
30  
31  
32  
33  
34  
35  
36  
37  
38  
39  
40  
41  
42  
43  
44  
45  
46  
47  
48  
49  
50  
51  
52  
53  
54  
55  
56  
57  
58  
59  
60

**Are you on any medicines?**

Yes  No

If so, which medicine and from whom do you obtain the medicine?

.....  
.....  
.....

**Are your children normally fit and well?**

Yes  No

If not, please give details.

.....  
.....

**What do you normally do when your child is unwell?**

.....  
.....  
.....

**Have your children received their immunisations?**

Yes  No

If so, which?

.....  
.....

**C. LAST MONTH**

**Have any of the children been ill in the last month?**

Yes  No

If so, have they seen a health professional? If so, state which type?

.....  
.....  
.....

**Have any of your children received any medicines in the last month?**

Yes  No

If so, which medicines?

.....  
.....

1  
2  
3  
4  
5  
6  
7  
8  
9  
10  
11  
12  
13  
14  
15  
16  
17  
18  
19  
20  
21  
22  
23  
24  
25  
26  
27  
28  
29  
30  
31  
32  
33  
34  
35  
36  
37  
38  
39  
40  
41  
42  
43  
44  
45  
46  
47  
48  
49  
50  
51  
52  
53  
54  
55  
56  
57  
58  
59  
60



Were the medicines prescribed and, if so, by whom?

.....

Where did you get the medicines from?

.....

Did you have to pay for the medicines?

Yes  No

.....

Were there any difficulties in obtaining the medicines? (Include travel costs)

Yes  No

.....

Have any of your children received any medicines (including herbal or homeopathic remedies) in the last month that you have bought from a chemist or obtained from any other individual?

Yes  No

If so, which medicines and from whom?

.....

.....

**D. LAST SIX MONTHS**

Have any of the children been ill in the last six months?

Yes  No

If so, have they seen a health professional? If so, state which type?

.....

.....

.....

Have any of your children received any medicines in the last six months?

Yes  No

If so, which medicines?

.....

.....

1  
2  
3  
4  
5  
6  
7  
8  
9  
10  
11  
12  
13  
14  
15  
16  
17  
18  
19  
20  
21  
22  
23  
24  
25  
26  
27  
28  
29  
30  
31  
32  
33  
34  
35  
36  
37  
38  
39  
40  
41  
42  
43  
44  
45  
46  
47  
48  
49  
50  
51  
52  
53  
54  
55  
56  
57  
58  
59  
60

Were the medicines prescribed and, if so, by whom?

.....

Where did you get the medicines from?

.....

Did you have to pay for the medicines?

Yes  No

.....

Were there any difficulties in obtaining the medicines? (Include travel costs)

Yes  No

.....

Have any of your children received any medicines (including herbal or homeopathic remedies) in the last six months that you have bought from a chemist or obtained from any other individual?

Yes  No

If so, which medicines and from whom?

.....

.....

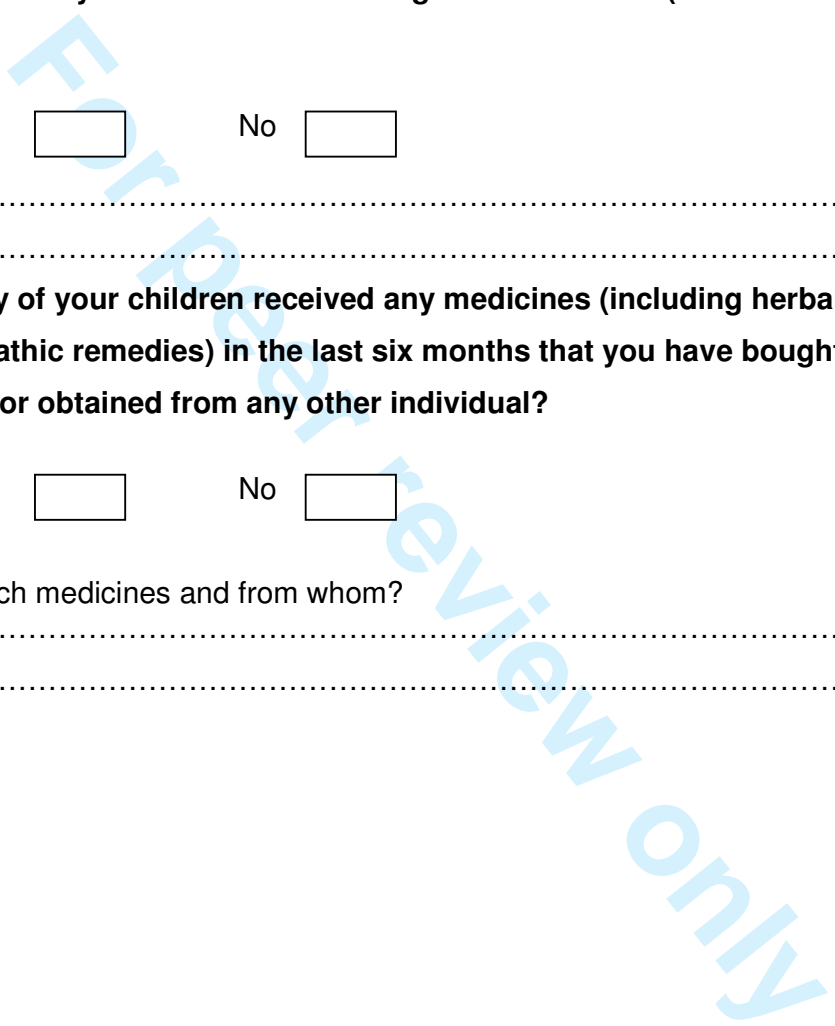

1  
2  
3  
4  
5  
6  
7  
8  
9  
10  
11  
12  
13  
14  
15  
16  
17  
18  
19  
20  
21  
22  
23  
24  
25  
26  
27  
28  
29  
30  
31  
32  
33  
34  
35  
36  
37  
38  
39  
40  
41  
42  
43  
44  
45  
46  
47  
48  
49  
50  
51  
52  
53  
54  
55  
56  
57  
58  
59  
60

# BMJ Open

## Access to medicines by child refugees in the East Midlands region of England – a cross-sectional study

|                                 |                                                                                                                                                                                                                                                                                                                                                                                                                   |
|---------------------------------|-------------------------------------------------------------------------------------------------------------------------------------------------------------------------------------------------------------------------------------------------------------------------------------------------------------------------------------------------------------------------------------------------------------------|
| Journal:                        | <i>BMJ Open</i>                                                                                                                                                                                                                                                                                                                                                                                                   |
| Manuscript ID:                  | bmjopen-2014-006421.R1                                                                                                                                                                                                                                                                                                                                                                                            |
| Article Type:                   | Research                                                                                                                                                                                                                                                                                                                                                                                                          |
| Date Submitted by the Author:   | 16-Oct-2014                                                                                                                                                                                                                                                                                                                                                                                                       |
| Complete List of Authors:       | Alkhatani, Saad; University of Nottingham, child Health<br>Cherrill, Janine; University of Nottingham, child Health<br>Millward, Claire; Derbyshire Childrens Hospital, Clinical Psychology<br>Grayson, Keith; Refugee Action,<br>Hilliam, Rachel; Open University,<br>Sammons, Helen; University of Nottingham, child Health<br>Choonara, Imti; Derbyshire Childrens Hospital, Academic Division of Child Health |
| <b>Primary Subject Heading</b>: | Paediatrics                                                                                                                                                                                                                                                                                                                                                                                                       |
| Secondary Subject Heading:      | Pharmacology and therapeutics, Health services research, Health policy, Global health                                                                                                                                                                                                                                                                                                                             |
| Keywords:                       | Health policy < HEALTH SERVICES ADMINISTRATION & MANAGEMENT, Rationing < HEALTH SERVICES ADMINISTRATION & MANAGEMENT, PRIMARY CARE                                                                                                                                                                                                                                                                                |
|                                 |                                                                                                                                                                                                                                                                                                                                                                                                                   |

SCHOLARONE™  
Manuscripts

only

1  
2  
3 **Access to medicines by child refugees in the East Midlands region of**  
4 **England – a cross-sectional study**  
5

6 Alkahtani S<sup>1</sup>, Cherrill J<sup>1</sup>, Millward C<sup>2</sup>, Grayson K<sup>3</sup>, Hilliam R<sup>4</sup>, Sammons H<sup>1</sup>, Choonara I<sup>1</sup>  
7  
8

9  
10 <sup>1</sup>Academic Division of Child Health, University of Nottingham, Derbyshire Children's Hospital, Derby  
11 UK  
12

13  
14 <sup>2</sup>Department of Clinical Psychology, Derbyshire Children's Hospital, Derby UK  
15  
16

17  
18 <sup>3</sup>Refugee Action, Chancery House, 7 Millstone Lane, Leicester, LE1 5JN, UK  
19

20 <sup>4</sup>Statistics Lecturer, The Open University, Walton Hall, Milton Keynes, MK7 6AA, UK  
21  
22

23  
24  
25  
26 Corresponding author

27 Imti Choonara

28 Emeritus Professor in Child Health

29 Academic Division of Child Health

30 The Medical School

31 University of Nottingham

32 Derbyshire Children's Hospital

33 Uttoxeter Road

34 Derby DE22 3DT  
35  
36  
37  
38  
39  
40  
41  
42  
43  
44  
45  
46  
47  
48  
49  
50  
51  
52  
53  
54  
55  
56  
57  
58  
59  
60

## Abstract

*Objectives:* To explore access to primary health care and drug therapy by refugee children in the East Midlands region of England.

*Design:* Interviews with refugees with children and a control group of British parents with children.

*Setting:* East Midlands region of England

*Participants:* 50 refugees with children and a control group of 50 parents with children.

*Main outcome measures:* Number of medicines used by children in the last month and the last six months. Health of parents and children. Registration with a GP.

*Results:* Refugee parents were more likely to have ill health than control parents (18v5,  $p=0.002$ ). All families in both groups were registered with a GP. There was no difference in the number of children in the two groups experiencing illnesses. In the last month, 30 refugee children received 60 medicines and 31 control children 63 medicines. In the last 6 months, 48 refugee children received 108 medicines and 43 control children 96 medicines. There was no difference between the two groups of children in relation to the likelihood of receiving any medicines in either the last month ( $P=0.839$ ) or the last 6 months ( $P=0.81$ ). Children in the refugee group were more likely to receive prescribed medicines for both the last month ( $p=0.008$ ) and the last six months ( $p<0.001$ ). They were also less likely to receive OTC medicines in the last 6 months ( $P=0.009$ ).

*Conclusions:* The refugee children in this study in the East Midlands had access to primary health care, medicines and a family doctor. They were more likely to receive prescribed medicines and less likely to receive OTC medicines, especially paracetamol.

**Keywords:** access, medicines, refugees, OTC medicines

### Article Summary:

#### *Article Focus*

- Adult refugees are likely to experience problems in accessing healthcare in the UK
- Refugee children are a vulnerable group of children who may have difficulties experiencing healthcare
- There may be a link between access to healthcare and the number of medicines received by children

1  
2  
3  
4  
5  
6  
7  
8  
9  
10  
11  
12  
13  
14  
15  
16  
17  
18  
19  
20  
21  
22  
23  
24  
25  
26  
27  
28  
29  
30  
31  
32  
33  
34  
35  
36  
37  
38  
39  
40  
41  
42  
43  
44  
45  
46  
47  
48  
49  
50  
51  
52  
53  
54  
55  
56  
57  
58  
59  
60

*Key Messages*

- The group of refugee children in this study in the East Midlands of England were immunised and registered with a GP
- The refugee children received the same number of overall medicines as control children
- The refugee children were less likely to receive over the counter medicines and more likely to receive prescribed medicines (especially paracetamol)

*Strengths and limitations of this study*

- This study shows that it is possible to use the number of medicines used by children as a marker of access to primary healthcare
- The refugee families included in the study had all made contact with a charity dealing with refugees and may therefore experience better healthcare than others

## Introduction

Children have the right to access health care and receive medicines that are scientifically evaluated for both efficacy and safety. Research has mainly focused on clinical trials that have evaluated efficacy. Access is an area that has been inadequately explored [1]. Problems with access to health care and medicines are well recognised in low and lower middle income countries. More recent research in North America has revealed that in both the United States and Canada, children of different ethnic groups or without insurance may be less likely to receive medicines [2-5].

Refugee children are a highly vulnerable group of children who are less likely to receive full access to medicines and health care [6]. Adult refugees are likely to experience significant problems in accessing health care and medical treatment [6-8]. There have been relatively few studies looking at access to health care for refugee children in the UK and to date there have been no studies in the UK on whether these children receive satisfactory drug therapy. We have used the term 'refugees' to include both those who have been awarded refugee status and those seeking asylum. The aim was to explore access to health care and drug therapy in this vulnerable group of children.

## Methods

Ethical approval was obtained from the University of Nottingham Medical School Research Ethics Committee (Reference G/6/2010). Initial contact with both asylum seekers and refugees was made by Refugee Action (Nottingham branch). Parents, who Refugee Action staff identified as possibly being interested in participating in the research, were approached by the research investigators (SA and JC). Parents who then agreed to take part in the study were interviewed within a private room in the offices provided by Refugee Action in Nottingham. Written informed consent was obtained. If the participants did not speak/understand English/Arabic, then an interpreting service was used. Additional interviews were performed at a refugee drop in centre and a Muslim community centre in Derby. The interview involved collecting the following data, using a questionnaire (see Appendix 1).

- a) demographic data regarding age and number of children
- b) data regarding health of the family, children, registration with the GP and immunisation status of the children
- c) whether any of the children had been ill in the last month and if they had received any medicines, if so, from whom
- d) similar questions regarding illness and number of medicines for the last six months

The interviews were performed between November 2010 and November 2011.

A control group of parents were obtained in a local shopping centre. The investigators wore University t-shirts and ID badges and were provided with a quiet area with seating within the shopping centre.

1  
2  
3 Random adults were approached by the investigators and asked two questions :(1) Did they have  
4 children? (2) Were they British? If they answered yes to both questions and written informed consent  
5 was given, the interview was performed within the quiet seated area. Interviews with the control  
6 group of parents were performed between November 2011 and January 2012. Interviews took 10-20  
7 minutes and the same questions were asked as for the refugee group.  
8  
9

10  
11  
12 Statistical analysis was performed by using the Mann Whitney test for demographic data. The Chi-  
13 Squared test was used to compare the proportion of children with illness, and the proportion of  
14 children receiving medicines (both prescribed and OTC). It was not possible to perform a power  
15 calculation to determine the sample size as there was insufficient information available regarding the  
16 number of medicines used by children in the UK. It was therefore decided to aim for 50 parents in  
17 each group. This was a pragmatic decision based on discussions with Refugee Action. The research  
18 was performed as a pilot study in order to test the feasibility of parents recalling such information and  
19 in order to obtain pharmacoepidemiological data that would be useful for power calculations for  
20 subsequent national studies.  
21  
22  
23  
24  
25  
26  
27

## 28 Results

29  
30 Sixty six parents of children who were refugees/asylum seekers were invited to participate. Sixteen  
31 declined (reasons not given for declining), i.e. 50 agreed to participate. Thirty eight of the 50 parents  
32 who agreed to participate were male. Most refugees were from Iraq(20), Pakistan(6), Afghanistan(4)  
33 and Nigeria(4). There were one to two refugees from each of the following countries –  
34 Ethiopia, Somalia, Zimbabwe(all 2); Gambia, Iran, Tunisia, East Africa, Kenya, Sudan, Zambia, Vietnam  
35 (all one). Two refugees did not state their country of origin. The median age of the parents was 36  
36 years (range 24-58 years) and all were born outside the UK. They had lived in the UK for a median of  
37 6.25 years. Eighteen had been awarded refugee status. One parent had been refused refugee  
38 status and was lodging an appeal. The remaining 31 were seeking asylum but their cases had not  
39 been heard as yet. Eighteen parents reported that they had a chronic illness (four chronic back pain,  
40 four depression, two diabetes, two disabilities and six other illnesses). Eighteen parents were  
41 employed, five did not state their occupation and 27 were unemployed (Table 1).  
42  
43  
44  
45  
46  
47  
48

49 The control group consisted of 50 parents of whom 44 were female. Twenty one parents declined to  
50 participate in the study. Their ages ranged from 19 to 46 years with a median age of 34.5 years.  
51 Most of the parents were fit and well but five reported health problems (three asthma and two  
52 depression/stress). Twenty six of the control parents were employed. As expected, the control group  
53 of parents had lived in the current locality for a longer period (17.5 vs 4.75 median years). Refugee  
54 parents were more likely to have health problems.  
55  
56  
57  
58  
59  
60



### *Access to health care and medicines*

All families were registered with a GP. There was no significant difference in the number of days since the last visit to the GP (14 vs 15 days, refugees vs control). All but one of the refugee parents and all but five of the control group families had visited the GP in the past six months.

There was a significant difference ( $p=0.008$ ) in that nine of the refugee parents stated that they had experienced difficulties visiting the GP in relation to affording the travel costs and language problems. None of the control group parents stated they had any difficulties.

### *Children's health*

There were 117 children in the refugee group and 99 in the control group. The median number of children per family was two in both groups ( $p=0.22$ ). The median ages of the children were five and four years respectively (refugees vs control). The interquartile ranges for ages of the children were 2.25-8 and 1.9-8 years respectively in the two groups and there was no significant difference in the ages ( $p=0.13$ ). All but one child in the refugee group were immunised. Four children in the refugee group had chronic medical problems (congenital heart disease, asthma, cancer and poor growth). Seven children in the control group had chronic medical problems (asthma (4), epilepsy, ADHD and arthritis).

There were 29 refugee families and 30 control families with an ill child in the last month. In the last month 30 refugee children received 60 medicines and 31 control children received 63 medicines (Table 2 ). Paracetamol was the most frequently used medicine in both groups. The majority of the medicines for refugee children were prescribed (41 out of 60). In contrast, the majority of medicines for control children were OTC medicines (37 out of 63).

In the last 6 months, all 50 refugee families and 45 control families had an ill child. In the last 6 months, 48 refugee children received 108 medicines and 43 control children received 96 medicines (Table 3). Paracetamol was the most frequently used medicine in both groups. The majority of the medicines for refugee children were prescribed (83 out of 108). In contrast, the majority of the medicines for control children were OTC Medicines (52 out of 96).

1  
2  
3  
4 There was no difference between the two groups of children in relation to the likelihood of receiving  
5 any medicines in either the last month (P=0.839) or the last 6 months (P=0.81). Children in the  
6 refugee group were more likely to receive prescribed medicines for both the last month (p=0.008) and  
7 the last six months (p<0.001). They were also less likely to receive OTC medicines in the last 6  
8 months (P=0.009). Analgesics/anti-pyretics were the most frequently used medicines in both the last  
9 month and the last six months (Table 2).  
10  
11  
12

## 13 14 15 16 17 **Discussion**

18  
19 Based on the answers given by the parents, child refugees were similar to the control group of children  
20 in relation to the presence of chronic medical problems and immunisation status. The main aim of  
21 this study was to compare the number of medicines used by refugee children in comparison with  
22 control children. It was reassuring to see that the total number of medicines used by both groups of  
23 children in both the past month and the past six months was similar. Alongside the fact that all  
24 families were registered with a GP suggests that refugee parents in this study were managing to  
25 access primary health care and ensure that their children receive adequate treatment. This is despite  
26 the difficulties in travel costs and language noted by refugee parents. Refugee children were, however,  
27 less likely to receive over the counter (OTC) medicines and more likely to receive prescribed  
28 medicines than control children.  
29  
30  
31  
32  
33

34  
35 A study in Dutch adolescents demonstrated that a higher socioeconomic status was associated with  
36 an increase in OTC drug use [9]. Similar findings were reported in German children and adolescents  
37 [10]. A study in the UK identified that the cost of OTCs affected only the most deprived sections of the  
38 population [11]. Refugees face considerable financial difficulties in that asylum seekers are not  
39 allowed to work and receive significantly less financial assistance than others on welfare benefits [12].  
40 Analgesics/antipyretics are the most frequently purchased OTC medicines by parents for children in  
41 the UK [11]. The two most common reasons for buying OTC medicines by British parents included; 1)  
42 not wishing to bother a GP for minor illness and 2) to have a medicine in case of future need [11]. It is  
43 likely that the lower OTC use in refugee children is related to the financial cost of OTC medicines.  
44  
45  
46  
47

48  
49 Adult refugees were more likely to have health problems than the control parents in this study. This is  
50 in keeping with previous studies as refugees often come from countries affected by armed conflict and  
51 are likely to have experienced bereavement, displacement or torture [12]. It is important to recognise  
52 that there are many differences in refugees worldwide and that the health problems of refugees from  
53 the Middle East in the UK are likely to be different to those of South-East Asian refugees in Canada  
54 [13].  
55  
56  
57  
58  
59  
60

1  
2  
3  
4 There have been very few studies looking at access to health care by refugee children [14, 15].  
5 Additionally, there have been no previous studies specifically looking at the pharmacoepidemiology of  
6 medicines received by refugee children. Our small study shows that it is possible to use both the  
7 number of medicines used by children over the last month or the last six months as a marker of  
8 access to health care. It is important to recognise the limitations of our study. Firstly, most of the  
9 refugees interviewed had been in contact with Refugee Action. These were refugees who had made  
10 contact with a charity and were therefore fully informed of their rights, especially with regards to health  
11 care. Unfortunately, due to government cutbacks, the Nottingham office of Refugee Action has now  
12 closed down and the nearest Refugee Action office is in Leicester, which is 40 km away. From April  
13 2014 Refugee Action no longer has a grant agreement with the Home Office to provide advice and  
14 support (formally One Stop Shop) to individuals and families going through the asylum system. This  
15 work is now provided through another agency; Migrant Help. Migrant Help services are split into  
16 Asylum Support Applications UK and Asylum Advice UK and are provided across the UK mainly  
17 through a national telephone service with some limited outreach (for the East Midlands in Derby,  
18 Nottingham and Leicester one day per week respectively). Refugee Action continue to provide a  
19 national Assisted Voluntary Returns project; Choices. A project for vulnerable destitute women in  
20 Leicester; Fresh Start and a volunteer run project for vulnerable people; Prevention of Asylum  
21 Homelessness which helps people to appeal refusals of support under s4 of the Immigration and  
22 Asylum Act 1999,

23  
24 It is also likely that if we had looked at a different group of children, for example refugee children  
25 presenting to the Emergency Department, our findings may have been different. A small study in  
26 Ireland of 25 refugees found that 20% of refugees were not registered with a GP [15]. Additionally,  
27 we did not look at the access to health care and medicines of refugee children held in immigration  
28 detention centres. Others have highlighted that these children experience significant health problems  
29 [16]. It was not possible to match controls and refugee parents by either socio economic status or  
30 gender. The former is impossible in the UK as asylum seekers receive less financial support than  
31 others on welfare benefit [12]. The latter was not possible for cultural reasons – many of the refugees  
32 were from countries where it is expected that men answer the questions for the family. It is important  
33 to recognise that the number of people seeking refugee status in the UK is actually quite low (less  
34 than 20,000 in 2011) [17]. Unfortunately, the main political parties and a large section of the media  
35 wishes to restrict access to health care for both refugees and economic migrants [18]. It is likely,  
36 therefore, that in the future refugee children in the UK will experience more difficulties in accessing  
37 both health care and medicines.  
38  
39  
40  
41  
42  
43  
44  
45  
46  
47  
48  
49  
50  
51  
52

### 53 Contributors

54 IC conceived the original idea and study design. This was modified following discussion with  
55 SA,CM,HS,RH and KG. SA and JC performed the interviews and collected all the data. KG helped  
56  
57

facilitate the collection of the data. Data was analysed by IC,RH,SA,JC,HS and KG. All authors contributed to the writing of the paper and approved the final manuscript.

Competing interests

None

### Funding

This research received no specific grant from any funding agency in the public, commercial or not for profit sectors.

Data sharing

No additional data available

**Table 1** Sociodemographics of parents

|                                      | Refugee | Control | p-value |
|--------------------------------------|---------|---------|---------|
| Median age (y)                       | 36      | 34.5    | 0.12    |
| Male                                 | 38      | 6       | <0.001  |
| Ill health                           | 18      | 5       | 0.002   |
| Employed                             | 18      | 26      | 0.24    |
| No of years in current accommodation | 2.3     | 7.4     | <0.001  |
| No of years in current locality      | 4.8     | 17.5    | < 0.001 |

**Table 2** Medicines used in the last month

| Medicines          | Refugee    |           |           | Control    |           |           |
|--------------------|------------|-----------|-----------|------------|-----------|-----------|
|                    | Prescribed | OTC       | Total     | Prescribed | OTC       | Total     |
| Paracetamol        | 20         | 2         | <b>22</b> | 10         | 14        | <b>24</b> |
| Ibuprofen          | 2          | 0         | <b>2</b>  | 2          | 6         | <b>8</b>  |
| Antibiotics        | 7          | 0         | <b>7</b>  | 6          | 0         | <b>6</b>  |
| Inhalers           | 3          | 0         | <b>3</b>  | 5          | 0         | <b>5</b>  |
| Cough suppressants | 1          | 2         | <b>3</b>  | 3          | 1         | <b>4</b>  |
| Topical            | 0          | 0         | <b>0</b>  | 0          | 1         | <b>1</b>  |
| Vitamins           | 1          | 2         | <b>3</b>  | 0          | 10        | <b>10</b> |
| Teething medicines | 0          | 0         | <b>0</b>  | 0          | 3         | <b>3</b>  |
| Lactulose          | 2          | 0         | <b>2</b>  | 0          | 0         | <b>0</b>  |
| Honey              | 0          | 8         | <b>8</b>  | 0          | 0         | <b>0</b>  |
| Herbal             | 0          | 4         | <b>4</b>  | 0          | 1         | <b>1</b>  |
| Others             | 3          | 1         | <b>4</b>  | 0          | 1         | <b>1</b>  |
| Unknown            | 2          | 0         | <b>2</b>  | 0          | 0         | <b>0</b>  |
| <b>Total</b>       | <b>41</b>  | <b>19</b> | <b>60</b> | <b>26</b>  | <b>37</b> | <b>63</b> |

**Table 3** Medicines used in the last 6 months

| Medicines          | Refugee    |           |            | Control    |           |           |
|--------------------|------------|-----------|------------|------------|-----------|-----------|
|                    | Prescribed | OTC       | Total      | Prescribed | OTC       | Total     |
| Paracetamol        | 39         | 4         | <b>43</b>  | 19         | 23        | <b>42</b> |
| Ibuprofen          | 2          | 0         | <b>2</b>   | 2          | 10        | <b>12</b> |
| Antibiotics        | 10         | 0         | <b>10</b>  | 10         | 0         | <b>10</b> |
| Inhalers           | 4          | 0         | <b>4</b>   | 5          | 0         | <b>5</b>  |
| Cough suppressants | 6          | 2         | <b>8</b>   | 4          | 2         | <b>6</b>  |
| Topical            | 8          | 0         | <b>8</b>   | 2          | 1         | <b>3</b>  |
| Vitamins           | 2          | 2         | <b>4</b>   | 0          | 10        | <b>10</b> |
| Teething medicines | 0          | 1         | <b>1</b>   | 0          | 4         | <b>4</b>  |
| Lactulose          | 2          | 0         | <b>2</b>   | 0          | 0         | <b>0</b>  |
| Oral Rehydration   | 1          | 0         | <b>1</b>   | 2          | 1         | <b>3</b>  |
| Honey              | 0          | 8         | <b>8</b>   | 0          | 0         | <b>0</b>  |
| Herbal             | 0          | 5         | <b>5</b>   | 0          | 1         | <b>1</b>  |
| Others             | 2          | 3         | <b>5</b>   | 0          | 0         | <b>0</b>  |
| Unknown            | 4          | 0         | <b>4</b>   | 0          | 0         | <b>0</b>  |
| Iron               | 3          | 0         | <b>3</b>   | 0          | 0         | <b>0</b>  |
| <b>Total</b>       | <b>83</b>  | <b>25</b> | <b>108</b> | <b>44</b>  | <b>52</b> | <b>96</b> |

## References

1. Berkovitch M, Choonara I, Jacqz-Aigrain E et al. Improving research and access to children's medicines worldwide. *Paed Perinat Drug Ther* 2008; 8: 138-139
2. Pletcher M J, Kertesz S G, Kohn M A, Gonzales R. Trends in opioids prescribing by race/ethnicity for patients seeking care in US emergency departments. *JAMA* 2008; 299: 70-78.
3. Yen K, Kim M, Stremski E S, Gorelick M H. Effect of ethnicity and race on the use of pain medications in children with long bone fractures in the emergency department. *Ann Emerg Med* 2003; 42: 41-47.
4. Chen A Y, Chang R K R. Factors associated with prescription drug expenditures among children: an analysis of the medical expenditure panel survey. *Pediatrics* 2002; 109: 728-732.
5. Reime B, Tu A W, Lee S K, Canadian Neonatal Network. Treatment differences between Aboriginal and white infants admitted to Canadian neonatal intensive care units. *Paed Perinat Epidemiol* 2007; 21: 532-540.
6. Royal College of Paediatrics and Child Health. *Inequalities in child health*, 1998.
7. Arnold FW. Seeking medical justice. *BMJ* 2008; 336: 683-684.
8. Reeves M, de Wildt G, Murshali H et al. Access to health care for people seeking asylum in the UK. *B J Gen Pract* 2006; 56: 306-308.
9. Tobi H, Meijer WM, Tunistra J, de Jong-van den Berg LTW. Socio-economic differences in prescription and OTC drug use in Dutch adolescents. *Pharm World Sci* 2003; 25: 203-206.
10. Du Y, Knopf H. Self-medication among children and adolescents in Germany: results of the National Health Survey for Children and Adolescents (KiGGS). *Br Clin Pharmacol* 2009; 68: 599-608.
11. McIntyre J, Conroy S, Collier J et al. Use of over-the-counter medicines in children. *Int J Pharm Pract* 2003; 11: 209-215.

- 1  
2  
3 12. Taylor K. Asylum seekers, refugees, and the politics of access to health care: a UK  
4 perspective. *Br J Gen Pract* 2009; 59: 765-772.  
5  
6
- 7  
8 13. Fung K, Wong Y-LR. Factors influencing attitudes towards seeking professional help among  
9 East and Southeast Asian immigrant and refugee women. *Int J Soc Psychiatry* 2007; 53:  
10 216-231.  
11
- 12  
13 14. Davidson N, Skull S, Burgner D et al. An issue of access: delivering equitable health care for  
14 newly arrived refugee children in Australia. *J Paediatr Child Health* 2004; 40: 569-575.  
15  
16
- 17  
18 15. Prendiville T, Williamson M, Cahill P, Loftus BG. Access of asylum seeker children to acute  
19 paediatric services. *Ir Med J* 2007; 100: 362-363.  
20  
21
- 22  
23 16. Lorek A, Ehntholt K, Nesbitt A et al. The mental and physical health difficulties of children  
24 held within a British immigration detention center: a pilot study. *Child Abuse Neglect* 2009; 33:  
25 573-585.  
26  
27
- 28  
29 17. Blinder S. Briefing: Migration to the UK: Asylum, published 13/02/2013.  
30 [www.migrationobservatory.ox.ac.uk](http://www.migrationobservatory.ox.ac.uk) (accessed 12 March 2013)  
31  
32
- 33  
34 18. Delamothe T. Migrant healthcare: public health versus politics. *BMJ* 2012; 344: e924.  
35  
36  
37  
38  
39  
40  
41  
42  
43  
44  
45  
46  
47  
48  
49  
50  
51  
52  
53  
54  
55  
56  
57  
58  
59  
60



1  
2  
3 **Access to medicines by child refugees in the East Midlands region of**  
4 **England – a cross-sectional study**  
5

6 Alkahtani S<sup>1</sup>, Cherrill J<sup>1</sup>, Millward C<sup>2</sup>, Grayson K<sup>3</sup>, Hilliam R<sup>4</sup>, Sammons H<sup>1</sup>, Choonara I<sup>1</sup>  
7  
8

9  
10 <sup>1</sup>Academic Division of Child Health, University of Nottingham, Derbyshire Children's Hospital, Derby  
11 UK  
12

13  
14 <sup>2</sup>Department of Clinical Psychology, Derbyshire Children's Hospital, Derby UK  
15  
16

17  
18 <sup>3</sup>Refugee Action, Chancery House, 7 Millstone Lane, Leicester, LE1 5JN, UK  
19

20 <sup>4</sup>Statistics Lecturer, The Open University, Walton Hall, Milton Keynes, MK7 6AA, UK  
21  
22

23  
24  
25  
26 Corresponding author

27 Imti Choonara

28 Emeritus Professor in Child Health

29 Academic Division of Child Health

30 The Medical School

31 University of Nottingham

32 Derbyshire Children's Hospital

33 Uttoxeter Road

34 Derby DE22 3DT  
35  
36  
37  
38  
39  
40  
41  
42  
43  
44  
45  
46  
47  
48  
49  
50  
51  
52  
53  
54  
55  
56  
57  
58  
59  
60

## Abstract

*Objectives:* To explore access to primary health care and drug therapy by refugee children in the East Midlands region of England.

*Design:* Interviews with refugees with children and a control group of British parents with children.

*Setting:* East Midlands region of England

*Participants:* 50 refugees with children and a control group of 50 parents with children.

*Main outcome measures:* Number of medicines used by children in the last month and the last six months. Health of parents and children. Registration with a GP.

*Results:* Refugee parents were more likely to have ill health than control parents (18v5,  $p=0.002$ ). All families in both groups were registered with a GP. There was no difference in the number of children in the two groups experiencing illnesses. In the last month, 30 refugee children received 60 medicines and 31 control children 63 medicines. In the last 6 months, 48 refugee children received 108 medicines and 43 control children 96 medicines. There was no difference between the two groups of children in relation to the likelihood of receiving any medicines in either the last month ( $P=0.839$ ) or the last 6 months ( $P=0.81$ ). Children in the refugee group were more likely to receive prescribed medicines for both the last month ( $p=0.008$ ) and the last six months ( $p<0.001$ ). They were also less likely to receive OTC medicines in the last 6 months ( $P=0.009$ ).

*Conclusions:* The refugee children in this study in the East Midlands had access to primary health care, medicines and a family doctor. They were more likely to receive prescribed medicines and less likely to receive OTC medicines, especially paracetamol.

*Keywords:* access, medicines, refugees, OTC medicines

## Article Summary:

### Article Focus

- Adult refugees are likely to experience problems in accessing healthcare in the UK
- Refugee children are a vulnerable group of children who may have difficulties experiencing healthcare
- There may be a link between access to healthcare and the number of medicines received by children

1  
2  
3  
4  
5  
6  
7  
8  
9  
10  
11  
12  
13  
14  
15  
16  
17  
18  
19  
20  
21  
22  
23  
24  
25  
26  
27  
28  
29  
30  
31  
32  
33  
34  
35  
36  
37  
38  
39  
40  
41  
42  
43  
44  
45  
46  
47  
48  
49  
50  
51  
52  
53  
54  
55  
56  
57  
58  
59  
60

### *Key Messages*

- The group of refugee children in this study in the East Midlands of England were immunised and registered with a GP
- The refugee children received the same number of overall medicines as control children
- The refugee children were less likely to receive over the counter medicines and more likely to receive prescribed medicines (especially paracetamol)

### *Strengths and limitations of this study*

- This study shows that it is possible to use the number of medicines used by children as a marker of access to primary healthcare
- The refugee families included in the study had all made contact with a charity dealing with refugees and may therefore experience better healthcare than others

## Introduction

Children have the right to access health care and receive medicines that are scientifically evaluated for both efficacy and safety. Research has mainly focused on clinical trials that have evaluated efficacy. Access is an area that has been inadequately explored [1]. Problems with access to health care and medicines are well recognised in low and lower middle income countries. More recent research in North America has revealed that in both the United States and Canada, children of different ethnic groups or without insurance may be less likely to receive medicines [2-5].

Refugee children are a highly vulnerable group of children who are less likely to receive full access to medicines and health care [6]. Adult refugees are likely to experience significant problems in accessing health care and medical treatment [6-8]. There have been relatively few studies looking at access to health care for refugee children in the UK and to date there have been no studies in the UK on whether these children receive satisfactory drug therapy. We have used the term 'refugees' to include both those who have been awarded refugee status and those seeking asylum. The aim was to explore access to health care and drug therapy in this vulnerable group of children.

## Methods

Ethical approval was obtained from the University of Nottingham Medical School Research Ethics Committee (Reference G/6/2010). Initial contact with both asylum seekers and refugees was made by Refugee Action (Nottingham branch). Parents, who Refugee Action staff identified as possibly being interested in participating in the research, were approached by the research investigators (SA and JC). Parents who then agreed to take part in the study were interviewed within a private room in the offices provided by Refugee Action in Nottingham. **Written informed consent was obtained.** If the participants did not speak/understand English/Arabic, then an interpreting service was used. Additional interviews were performed at a refugee drop in centre and a Muslim community centre in Derby. The interview involved collecting the following data, using a questionnaire **(see Appendix 1).**

- a) demographic data regarding age and number of children
- b) data regarding health of the family, children, registration with the GP and immunisation status of the children
- c) whether any of the children had been ill in the last month and if they had received any medicines, if so, from whom
- d) similar questions regarding illness and number of medicines for the last six months

The interviews were performed between November 2010 and November 2011.

A control group of parents were obtained in a local shopping centre. **The investigators wore University t-shirts and ID badges and were provided with a quiet area with seating within the shopping centre.**

1  
2  
3 Random adults were approached by the investigators and asked two questions : (1) Did they have  
4 children? (2) Were they British? If they answered yes to both questions and written informed consent  
5 was given, the interview was performed within the quiet seated area. Interviews with the control  
6 group of parents were performed between November 2011 and January 2012. Interviews took 10-20  
7 minutes and the same questions were asked as for the refugee group.  
8  
9

10  
11  
12 Statistical analysis was performed by using the Mann Whitney test for demographic data. The Chi-  
13 Squared test was used to compare the proportion of children with illness, and the proportion of  
14 children receiving medicines (both prescribed and OTC). It was not possible to perform a power  
15 calculation to determine the sample size as there was insufficient information available regarding the  
16 number of medicines used by children in the UK. It was therefore decided to aim for 50 parents in  
17 each group. This was a pragmatic decision based on discussions with Refugee Action. The research  
18 was performed as a pilot study in order to test the feasibility of parents recalling such information and  
19 in order to obtain pharmacoepidemiological data that would be useful for power calculations for  
20 subsequent national studies.  
21  
22  
23  
24  
25  
26  
27

## 28 Results

29  
30 Sixty six parents of children who were refugees/asylum seekers were invited to participate. Sixteen  
31 declined (reasons not given for declining), i.e. 50 agreed to participate. Thirty eight of the 50 parents  
32 who agreed to participate were male. Most refugees were from Iraq(20), Pakistan(6), Afghanistan(4)  
33 and Nigeria(4). There were one to two refugees from each of the following countries –  
34 Ethiopia, Somalia, Zimbabwe(all 2); Gambia, Iran, Tunisia, East Africa, Kenya, Sudan, Zambia, Vietnam  
35 (all one). Two refugees did not state their country of origin. The median age of the parents was 36  
36 years (range 24-58 years) and all were born outside the UK. They had lived in the UK for a median of  
37 6.25 years. Eighteen had been awarded refugee status. One parent had been refused refugee  
38 status and was lodging an appeal. The remaining 31 were seeking asylum but their cases had not  
39 been heard as yet. Eighteen parents reported that they had a chronic illness (four chronic back pain,  
40 four depression, two diabetes, two disabilities and six other illnesses). Eighteen parents were  
41 employed, five did not state their occupation and 27 were unemployed (Table 1).  
42  
43  
44  
45  
46  
47  
48

49 The control group consisted of 50 parents of whom 44 were female. Twenty one parents declined to  
50 participate in the study. Their ages ranged from 19 to 46 years with a median age of 34.5 years.  
51 Most of the parents were fit and well but five reported health problems (three asthma and two  
52 depression/stress). Twenty six of the control parents were employed. As expected, the control group  
53 of parents had lived in the current locality for a longer period (17.5 vs 4.75 median years). Refugee  
54 parents were more likely to have health problems.  
55  
56  
57  
58  
59  
60

### *Access to health care and medicines*

All families were registered with a GP. There was no significant difference in the number of days since the last visit to the GP (14 vs 15 days, refugees vs control). All but one of the refugee parents and all but five of the control group families had visited the GP in the past six months.

There was a significant difference ( $p=0.008$ ) in that nine of the refugee parents stated that they had experienced difficulties visiting the GP in relation to affording the travel costs and language problems. None of the control group parents stated they had any difficulties.

### *Children's health*

There were 117 children in the refugee group and 99 in the control group. The median number of children per family was two in both groups ( $p=0.22$ ). The median ages of the children were five and four years respectively (refugees vs control). The interquartile ranges for ages of the children were 2.25-8 and 1.9-8 years respectively in the two groups and there was no significant difference in the ages ( $p=0.13$ ). All but one child in the refugee group were immunised. Four children in the refugee group had chronic medical problems (congenital heart disease, asthma, cancer and poor growth). Seven children in the control group had chronic medical problems (asthma (4), epilepsy, ADHD and arthritis).

There were 29 refugee families and 30 control families with an ill child in the last month. In the last month 30 refugee children received 60 medicines and 31 control children received 63 medicines (Table 2 ). Paracetamol was the most frequently used medicine in both groups. The majority of the medicines for refugee children were prescribed (41 out of 60). In contrast, the majority of medicines for control children were OTC medicines (37 out of 63).

In the last 6 months, all 50 refugee families and 45 control families had an ill child. In the last 6 months, 48 refugee children received 108 medicines and 43 control children received 96 medicines (Table 3). ). Paracetamol was the most frequently used medicine in both groups. The majority of the medicines for refugee children were prescribed (83 out of 108). In contrast, the majority of the medicines for control children were OTC Medicines (52 out of 96).

1  
2  
3  
4 There was no difference between the two groups of children in relation to the likelihood of receiving  
5 any medicines in either the last month (P=0.839) or the last 6 months (P=0.81). Children in the  
6 refugee group were more likely to receive prescribed medicines for both the last month (p=0.008) and  
7 the last six months (p<0.001). They were also less likely to receive OTC medicines in the last 6  
8 months (P=0.009). Analgesics/anti-pyretics were the most frequently used medicines in both the last  
9 month and the last six months (Table 2).  
10  
11  
12

## 13 14 15 16 17 Discussion

18  
19 Based on the answers given by the parents, child refugees were similar to the control group of children  
20 in relation to the presence of chronic medical problems and immunisation status. The main aim of  
21 this study was to compare the number of medicines used by refugee children in comparison with  
22 control children. It was reassuring to see that the total number of medicines used by both groups of  
23 children in both the past month and the past six months was similar. Alongside the fact that all  
24 families were registered with a GP suggests that refugee parents in this study were managing to  
25 access primary health care and ensure that their children receive adequate treatment. This is despite  
26 the difficulties in travel costs and language noted by refugee parents. Refugee children were, however,  
27 less likely to receive over the counter (OTC) medicines and more likely to receive prescribed  
28 medicines than control children.  
29  
30  
31  
32  
33

34  
35 A study in Dutch adolescents demonstrated that a higher socioeconomic status was associated with  
36 an increase in OTC drug use [9]. Similar findings were reported in German children and adolescents  
37 [10]. A study in the UK identified that the cost of OTCs affected only the most deprived sections of the  
38 population [11]. Refugees face considerable financial difficulties in that asylum seekers are not  
39 allowed to work and receive significantly less financial assistance than others on welfare benefits [12].  
40 Analgesics/antipyretics are the most frequently purchased OTC medicines by parents for children in  
41 the UK [11]. The two most common reasons for buying OTC medicines by British parents included; 1)  
42 not wishing to bother a GP for minor illness and 2) to have a medicine in case of future need [11]. It is  
43 likely that the lower OTC use in refugee children is related to the financial cost of OTC medicines.  
44  
45  
46  
47

48  
49 Adult refugees were more likely to have health problems than the control parents in this study. This is  
50 in keeping with previous studies as refugees often come from countries affected by armed conflict and  
51 are likely to have experienced bereavement, displacement or torture [12]. It is important to recognise  
52 that there are many differences in refugees worldwide and that the health problems of refugees from  
53 the Middle East in the UK are likely to be different to those of South-East Asian refugees in Canada  
54 [13].  
55  
56  
57  
58  
59  
60

1  
2  
3  
4 There have been very few studies looking at access to health care by refugee children [14, 15].  
5 Additionally, there have been no previous studies specifically looking at the pharmacoepidemiology of  
6 medicines received by refugee children. Our small study shows that it is possible to use both the  
7 number of medicines used by children over the last month or the last six months as a marker of  
8 access to health care. It is important to recognise the limitations of our study. Firstly, most of the  
9 refugees interviewed had been in contact with Refugee Action. These were refugees who had made  
10 contact with a charity and were therefore fully informed of their rights, especially with regards to health  
11 care. Unfortunately, due to government cutbacks, the Nottingham office of Refugee Action has now  
12 closed down and the nearest Refugee Action office is in Leicester, which is 40 km away. From April  
13 2014 Refugee Action no longer has a grant agreement with the Home Office to provide advice and  
14 support (formally One Stop Shop) to individuals and families going through the asylum system. This  
15 work is now provided through another agency; Migrant Help. Migrant Help services are split into  
16 Asylum Support Applications UK and Asylum Advice UK and are provided across the UK mainly  
17 through a national telephone service with some limited outreach (for the East Midlands in Derby,  
18 Nottingham and Leicester one day per week respectively). Refugee Action continue to provide a  
19 national Assisted Voluntary Returns project; Choices. A project for vulnerable destitute women in  
20 Leicester; Fresh Start and a volunteer run project for vulnerable people; Prevention of Asylum  
21 Homelessness which helps people to appeal refusals of support under s4 of the Immigration and  
22 Asylum Act 1999,

23  
24 It is also likely that if we had looked at a different group of children, for example refugee children  
25 presenting to the Emergency Department, our findings may have been different. A small study in  
26 Ireland of 25 refugees found that 20% of refugees were not registered with a GP [15]. Additionally,  
27 we did not look at the access to health care and medicines of refugee children held in immigration  
28 detention centres. Others have highlighted that these children experience significant health problems  
29 [16]. It was not possible to match controls and refugee parents by either socio economic status or  
30 gender. The former is impossible in the UK as asylum seekers receive less financial support than  
31 others on welfare benefit [12]. The latter was not possible for cultural reasons – many of the refugees  
32 were from countries where it is expected that men answer the questions for the family. It is important  
33 to recognise that the number of people seeking refugee status in the UK is actually quite low (less  
34 than 20,000 in 2011) [17]. Unfortunately, the main political parties and a large section of the media  
35 wishes to restrict access to health care for both refugees and economic migrants [18]. It is likely,  
36 therefore, that in the future refugee children in the UK will experience more difficulties in accessing  
37 both health care and medicines.  
38  
39  
40  
41  
42  
43  
44  
45  
46  
47  
48  
49  
50  
51  
52

### 53 Contributors

54 IC conceived the original idea and study design. This was modified following discussion with  
55 SA,CM,HS,RH and KG. SA and JC performed the interviews and collected all the data. KG helped  
56  
57  
58  
59  
60



facilitate the collection of the data. Data was analysed by IC,RH,SA,JC,HS and KG. All authors contributed to the writing of the paper and approved the final manuscript.

Competing interests

None

### Funding

This research received no specific grant from any funding agency in the public, commercial or not for profit sectors.

Data sharing

No additional data available

**Table 1** Sociodemographics of parents

|                                      | Refugee | Control | p-value |
|--------------------------------------|---------|---------|---------|
| Median age (y)                       | 36      | 34.5    | 0.12    |
| Male                                 | 38      | 6       | <0.001  |
| Ill health                           | 18      | 5       | 0.002   |
| Employed                             | 18      | 26      | 0.24    |
| No of years in current accommodation | 2.3     | 7.4     | <0.001  |
| No of years in current locality      | 4.8     | 17.5    | < 0.001 |

**Table 2** Medicines used in the last month

| Medicines          | Refugee    |           |           | Control    |           |           |
|--------------------|------------|-----------|-----------|------------|-----------|-----------|
|                    | Prescribed | OTC       | Total     | Prescribed | OTC       | Total     |
| Paracetamol        | 20         | 2         | <b>22</b> | 10         | 14        | <b>24</b> |
| Ibuprofen          | 2          | 0         | <b>2</b>  | 2          | 6         | <b>8</b>  |
| Antibiotics        | 7          | 0         | <b>7</b>  | 6          | 0         | <b>6</b>  |
| Inhalers           | 3          | 0         | <b>3</b>  | 5          | 0         | <b>5</b>  |
| Cough suppressants | 1          | 2         | <b>3</b>  | 3          | 1         | <b>4</b>  |
| Topical            | 0          | 0         | <b>0</b>  | 0          | 1         | <b>1</b>  |
| Vitamins           | 1          | 2         | <b>3</b>  | 0          | 10        | <b>10</b> |
| Teething medicines | 0          | 0         | <b>0</b>  | 0          | 3         | <b>3</b>  |
| Lactulose          | 2          | 0         | <b>2</b>  | 0          | 0         | <b>0</b>  |
| Honey              | 0          | 8         | <b>8</b>  | 0          | 0         | <b>0</b>  |
| Herbal             | 0          | 4         | <b>4</b>  | 0          | 1         | <b>1</b>  |
| Others             | 3          | 1         | <b>4</b>  | 0          | 1         | <b>1</b>  |
| Unknown            | 2          | 0         | <b>2</b>  | 0          | 0         | <b>0</b>  |
| <b>Total</b>       | <b>41</b>  | <b>19</b> | <b>60</b> | <b>26</b>  | <b>37</b> | <b>63</b> |

**Table 3** Medicines used in the last 6 months

| Medicines          | Refugee    |           |            | Control    |           |           |
|--------------------|------------|-----------|------------|------------|-----------|-----------|
|                    | Prescribed | OTC       | Total      | Prescribed | OTC       | Total     |
| Paracetamol        | 39         | 4         | <b>43</b>  | 19         | 23        | <b>42</b> |
| Ibuprofen          | 2          | 0         | <b>2</b>   | 2          | 10        | <b>12</b> |
| Antibiotics        | 10         | 0         | <b>10</b>  | 10         | 0         | <b>10</b> |
| Inhalers           | 4          | 0         | <b>4</b>   | 5          | 0         | <b>5</b>  |
| Cough suppressants | 6          | 2         | <b>8</b>   | 4          | 2         | <b>6</b>  |
| Topical            | 8          | 0         | <b>8</b>   | 2          | 1         | <b>3</b>  |
| Vitamins           | 2          | 2         | <b>4</b>   | 0          | 10        | <b>10</b> |
| Teething medicines | 0          | 1         | <b>1</b>   | 0          | 4         | <b>4</b>  |
| Lactulose          | 2          | 0         | <b>2</b>   | 0          | 0         | <b>0</b>  |
| Oral Rehydration   | 1          | 0         | <b>1</b>   | 2          | 1         | <b>3</b>  |
| Honey              | 0          | 8         | <b>8</b>   | 0          | 0         | <b>0</b>  |
| Herbal             | 0          | 5         | <b>5</b>   | 0          | 1         | <b>1</b>  |
| Others             | 2          | 3         | <b>5</b>   | 0          | 0         | <b>0</b>  |
| Unknown            | 4          | 0         | <b>4</b>   | 0          | 0         | <b>0</b>  |
| Iron               | 3          | 0         | <b>3</b>   | 0          | 0         | <b>0</b>  |
| <b>Total</b>       | <b>83</b>  | <b>25</b> | <b>108</b> | <b>44</b>  | <b>52</b> | <b>96</b> |

**References**

1. Berkovitch M, Choonara I, Jacqz-Aigrain E et al. Improving research and access to children's medicines worldwide. *Paed Perinat Drug Ther* 2008; 8: 138-139
2. Pletcher M J, Kertesz S G, Kohn M A, Gonzales R. Trends in opioids prescribing by race/ethnicity for patients seeking care in US emergency departments. *JAMA* 2008; 299: 70-78.
3. Yen K, Kim M, Stremski E S, Gorelick M H. Effect of ethnicity and race on the use of pain medications in children with long bone fractures in the emergency department. *Ann Emerg Med* 2003; 42: 41-47.
4. Chen A Y, Chang R K R. Factors associated with prescription drug expenditures among children: an analysis of the medical expenditure panel survey. *Pediatrics* 2002; 109: 728-732.
5. Reime B, Tu A W, Lee S K, Canadian Neonatal Network. Treatment differences between Aboriginal and white infants admitted to Canadian neonatal intensive care units. *Paed Perinat Epidemiol* 2007; 21: 532-540.
6. Royal College of Paediatrics and Child Health. *Inequalities in child health*, 1998.
7. Arnold FW. Seeking medical justice. *BMJ* 2008; 336: 683-684.
8. Reeves M, de Wildt G, Murshali H et al. Access to health care for people seeking asylum in the UK. *B J Gen Pract* 2006; 56: 306-308.
9. Tobi H, Meijer WM, Tunistra J, de Jong-van den Berg LTW. Socio-economic differences in prescription and OTC drug use in Dutch adolescents. *Pharm World Sci* 2003; 25: 203-206.
10. Du Y, Knopf H. Self-medication among children and adolescents in Germany: results of the National Health Survey for Children and Adolescents (KiGGS). *Br Clin Pharmacol* 2009; 68: 599-608.
11. McIntyre J, Conroy S, Collier J et al. Use of over-the-counter medicines in children. *Int J Pharm Pract* 2003; 11: 209-215.

- 1  
2  
3 12. Taylor K. Asylum seekers, refugees, and the politics of access to health care: a UK  
4 perspective. *Br J Gen Pract* 2009; 59: 765-772.  
5  
6  
7  
8 13. Fung K, Wong Y-LR. Factors influencing attitudes towards seeking professional help among  
9 East and Southeast Asian immigrant and refugee women. *Int J Soc Psychiatry* 2007; 53:  
10 216-231.  
11  
12  
13  
14 14. Davidson N, Skull S, Burgner D et al. An issue of access: delivering equitable health care for  
15 newly arrived refugee children in Australia. *J Paediatr Child Health* 2004; 40: 569-575.  
16  
17  
18 15. Prendiville T, Williamson M, Cahill P, Loftus BG. Access of asylum seeker children to acute  
19 paediatric services. *Ir Med J* 2007; 100: 362-363.  
20  
21  
22  
23 16. Lorek A, Ehntholt K, Nesbitt A et al. The mental and physical health difficulties of children  
24 held within a British immigration detention center: a pilot study. *Child Abuse Neglect* 2009; 33:  
25 573-585.  
26  
27  
28  
29 17. Blinder S. Briefing: Migration to the UK: Asylum, published 13/02/2013.  
30 [www.migrationobservatory.ox.ac.uk](http://www.migrationobservatory.ox.ac.uk) (accessed 12 March 2013)  
31  
32  
33  
34 18. Delamothe T. Migrant healthcare: public health versus politics. *BMJ* 2012; 344: e924.  
35  
36  
37  
38  
39  
40  
41  
42  
43  
44  
45  
46  
47  
48  
49  
50  
51  
52  
53  
54  
55  
56  
57  
58  
59  
60

# Children's Access to Medicines in the East Midlands Parental interview

## A. BACKGROUND

Age (years): ..... Male / Female

No. of adults living in the home: .....

No. of children: .....

Age of children: .....

Occupation: .....

Country of birth: .....

*If applicable*

Country left: .....

Reasons for leaving: .....

Date of entry to the UK: .....

Have you had a decision on your asylum claim: .....

Duration of time in present accommodation: .....

Duration of time in current locality: .....

Contacts in current locality: .....

Links with community:  
.....

## B. HEALTH

Are you registered with a GP?

Yes  No

If no, why is that?  
.....

Date of last visit to GP: .....

Are you well?

Yes  No

**Are you on any medicines?**

Yes  No

If so, which medicine and from whom do you obtain the medicine?

.....  
 .....  
 .....

**Are your children normally fit and well?**

Yes  No

If not, please give details.

.....  
 .....

**What do you normally do when your child is unwell?**

.....  
 .....

**Have your children received their immunisations?**

Yes  No

If so, which?

.....  
 .....

**C. LAST MONTH**

**Have any of the children been ill in the last month?**

Yes  No

If so, have they seen a health professional? If so, state which type?

.....  
 .....  
 .....

**Have any of your children received any medicines in the last month?**

Yes  No

If so, which medicines?

.....  
 .....

Were the medicines prescribed and, if so, by whom?

.....

Where did you get the medicines from?

.....

Did you have to pay for the medicines?

Yes  No

.....

Were there any difficulties in obtaining the medicines? (Include travel costs)

Yes  No

.....

.....

Have any of your children received any medicines (including herbal or homeopathic remedies) in the last month that you have bought from a chemist or obtained from any other individual?

Yes  No

If so, which medicines and from whom?

.....

.....

**D. LAST SIX MONTHS**

Have any of the children been ill in the last six months?

Yes  No

If so, have they seen a health professional? If so, state which type?

.....

.....

.....

Have any of your children received any medicines in the last six months?

Yes  No

If so, which medicines?

.....

.....



Were the medicines prescribed and, if so, by whom?

.....

Where did you get the medicines from?

.....

Did you have to pay for the medicines?

Yes  No

.....

Were there any difficulties in obtaining the medicines? (Include travel costs)

Yes  No

.....

Have any of your children received any medicines (including herbal or homeopathic remedies) in the last six months that you have bought from a chemist or obtained from any other individual?

Yes  No

If so, which medicines and from whom?

.....

.....

1  
2  
3  
4  
5  
6  
7  
8  
9  
10  
11  
12  
13  
14  
15  
16  
17  
18  
19  
20  
21  
22  
23  
24  
25  
26  
27  
28  
29  
30  
31  
32  
33  
34  
35  
36  
37  
38  
39  
40  
41  
42  
43  
44  
45  
46  
47  
48  
49  
50  
51  
52  
53  
54  
55  
56  
57  
58  
59  
60

# BMJ Open

## Access to medicines by child refugees in the East Midlands region of England – a cross-sectional study

|                                 |                                                                                                                                                                                                                                                                                                                                                                                                                   |
|---------------------------------|-------------------------------------------------------------------------------------------------------------------------------------------------------------------------------------------------------------------------------------------------------------------------------------------------------------------------------------------------------------------------------------------------------------------|
| Journal:                        | <i>BMJ Open</i>                                                                                                                                                                                                                                                                                                                                                                                                   |
| Manuscript ID:                  | bmjopen-2014-006421.R2                                                                                                                                                                                                                                                                                                                                                                                            |
| Article Type:                   | Research                                                                                                                                                                                                                                                                                                                                                                                                          |
| Date Submitted by the Author:   | 28-Nov-2014                                                                                                                                                                                                                                                                                                                                                                                                       |
| Complete List of Authors:       | Alkhatani, Saad; University of Nottingham, child Health<br>Cherrill, Janine; University of Nottingham, child Health<br>Millward, Claire; Derbyshire Childrens Hospital, Clinical Psychology<br>Grayson, Keith; Refugee Action,<br>Hilliam, Rachel; Open University,<br>Sammons, Helen; University of Nottingham, child Health<br>Choonara, Imti; Derbyshire Childrens Hospital, Academic Division of Child Health |
| <b>Primary Subject Heading</b>: | Paediatrics                                                                                                                                                                                                                                                                                                                                                                                                       |
| Secondary Subject Heading:      | Pharmacology and therapeutics, Health services research, Health policy, Global health                                                                                                                                                                                                                                                                                                                             |
| Keywords:                       | Health policy < HEALTH SERVICES ADMINISTRATION & MANAGEMENT, Rationing < HEALTH SERVICES ADMINISTRATION & MANAGEMENT, PRIMARY CARE                                                                                                                                                                                                                                                                                |
|                                 |                                                                                                                                                                                                                                                                                                                                                                                                                   |

SCHOLARONE™  
Manuscripts

only

1  
2  
3 **Access to medicines by child refugees in the East Midlands region of**  
4 **England – a cross-sectional study**  
5

6 Alkahtani S<sup>1</sup>, Cherrill J<sup>1</sup>, Millward C<sup>2</sup>, Grayson K<sup>3</sup>, Hilliam R<sup>4</sup>, Sammons H<sup>1</sup>, Choonara I<sup>1</sup>  
7  
8

9  
10 <sup>1</sup>Academic Division of Child Health, University of Nottingham, Derbyshire Children's Hospital, Derby  
11 UK  
12

13  
14 <sup>2</sup>Department of Clinical Psychology, Derbyshire Children's Hospital, Derby UK  
15  
16

17  
18 <sup>3</sup>Refugee Action, Chancery House, 7 Millstone Lane, Leicester, LE1 5JN, UK  
19

20 <sup>4</sup>Statistics Lecturer, The Open University, Walton Hall, Milton Keynes, MK7 6AA, UK  
21  
22

23  
24  
25  
26 Corresponding author

27 Imti Choonara

28 Emeritus Professor in Child Health

29 Academic Division of Child Health

30 The Medical School

31 University of Nottingham

32 Derbyshire Children's Hospital

33 Uttoxeter Road

34 Derby DE22 3DT  
35  
36  
37  
38  
39  
40  
41  
42  
43  
44  
45  
46  
47  
48  
49  
50  
51  
52  
53  
54  
55  
56  
57  
58  
59  
60

## Abstract

*Objectives:* To explore access to primary health care and drug therapy by refugee children in the East Midlands region of England.

*Design:* Interviews with refugees with children and a control group of British parents with children.

*Setting:* East Midlands region of England

*Participants:* 50 refugees with children and a control group of 50 parents with children.

*Main outcome measures:* Number of medicines used by children in the last month and the last six months. Health of parents and children. Registration with a GP.

*Results:* All families in both groups were registered with a GP. There was no difference in the number of children in the two groups experiencing illnesses. In the last month, 30 refugee children received 60 medicines and 31 control children 63 medicines. In the last 6 months, 48 refugee children received 108 medicines and 43 control children 96 medicines. There was no difference between the two groups of children in relation to the likelihood of receiving any medicines in either the last month ( $P=0.839$ ) or the last 6 months ( $P=0.81$ ). Children in the refugee group were more likely to receive prescribed medicines for both the last month ( $p=0.008$ ) and the last six months ( $p<0.001$ ). They were also less likely to receive OTC medicines in the last 6 months ( $P=0.009$ ).

*Conclusions:* The refugee children in this study in the East Midlands had access to primary health care, medicines and a family doctor. They were more likely to receive prescribed medicines and less likely to receive OTC medicines, especially paracetamol.

**Keywords:** access, medicines, refugees, OTC medicines

### Article Summary:

#### *Strengths and limitations of this study*

- Study in refugee children – a vulnerable group
- The number of medicines used by children as a marker of access to primary healthcare
- The refugee families all had contact with a charity dealing with refugees.

## Introduction

The right to access healthcare is included in the Universal Declaration of Human Rights by the United Nations [1]. Children have the right to access health care and receive medicines that are scientifically evaluated for both efficacy and safety [2,3]. Research has mainly focused on clinical trials that have evaluated efficacy. Access is an area that has been inadequately explored [4]. Problems with access to health care and medicines are well recognised in low and lower middle income countries. The lack of free universal healthcare in many countries results in people being unable to afford consultations with health professionals, unnecessary investigations and medical treatment [1,5]. Only one in four children with diarrhoea in India receive treatment with oral rehydration salts [1,6]. More recent research in North America has revealed that in both the United States and Canada, children of different ethnic groups or without insurance may be less likely to receive medicines [7-10].

Refugee children are a highly vulnerable group of children who are less likely to receive full access to medicines and health care [11]. Adult refugees are likely to experience significant problems in accessing health care and medical treatment [11-13]. In the UK all refugees are entitled to access primary healthcare, which includes registering with a GP [14]. However concern has been raised that both refugees and health professionals are confused about what is available and refugees may not register with a GP because they are unaware that they have that right [14,15].

There have been relatively few studies looking at access to health care for refugee children in the UK and to date there have been no studies in the UK on whether these children receive satisfactory drug therapy. We have used the term 'refugees' to include both those who have been awarded refugee status and those seeking asylum. The aim was to explore access to health care and drug therapy in this vulnerable group of children.

## Methods

Ethical approval was obtained from the University of Nottingham Medical School Research Ethics Committee (Reference G/6/2010). Initial contact with both asylum seekers and refugees was made by Refugee Action (Nottingham branch). All refugees attending a Refugee Action appointment were asked if they had children and if they would be interested in participating in the research. Those parents, who Refugee Action staff identified as possibly being interested in participating in the research, were approached by the research investigators (SA and JC). Parents who then agreed to take part in the study were interviewed within a private room in the offices provided by Refugee Action in Nottingham. Written informed consent was obtained. If the participants did not speak/understand English/Arabic, then an interpreting service was used. Additional interviews were performed at a refugee drop in centre and a Muslim community centre in Derby, by one of the researchers (SA).

1  
2  
3 Again refugees were asked if they had children and if they would be interested in participating in the  
4 research. The interview involved collecting the following data, using a questionnaire (see Appendix 1).

- 5 a) demographic data regarding age and number of children  
6  
7 b) data regarding health of the family, children, registration with the GP and immunisation status  
8 of the children  
9  
10 c) whether any of the children had been ill in the last month and if they had received any  
11 medicines, if so, from whom  
12  
13 d) similar questions regarding illness and number of medicines for the last six months

14 The interviews were performed between November 2010 and November 2011.

15  
16  
17  
18 A control group of parents were obtained in a local shopping centre. The investigators wore University  
19 t-shirts and ID badges and were provided with a quiet area with seating within the shopping centre.  
20 Adults in the shopping centre were approached by the investigators and asked two questions : (1) Did  
21 they have children? (2) Were they British? If they answered yes to both questions and written  
22 informed consent was given, the interview was performed within the quiet seated area. Interviews  
23 with the control group of parents were performed between November 2011 and January 2012.  
24 Interviews took 10-20 minutes and the same questions were asked as for the refugee group.  
25  
26  
27  
28

29  
30  
31 Statistical analysis was performed by using the Mann Whitney test for demographic data. The Chi-  
32 Squared test was used to compare the proportion of children with illness, and the proportion of  
33 children receiving medicines (both prescribed and OTC). It was not possible to perform a power  
34 calculation to determine the sample size as there was insufficient information available regarding the  
35 number of medicines used by children in the UK. It was therefore decided to aim for 50 parents in  
36 each group. This was a pragmatic decision based on discussions with Refugee Action. The research  
37 was performed as a pilot study in order to test the feasibility of parents recalling such information and  
38 in order to obtain pharmacoepidemiological data that would be useful for power calculations for  
39 subsequent national studies.  
40  
41  
42  
43  
44  
45

## 46 Results

47  
48  
49 Sixty six parents of children who were refugees/asylum seekers were invited to participate. Sixteen  
50 declined (reasons not given for declining), i.e. 50 agreed to participate. Thirty eight of the 50 parents  
51 who agreed to participate were male. Most refugees were from Iraq(20), Pakistan(6), Afghanistan(4)  
52 and Nigeria(4). There were one to two refugees from each of the following countries –  
53 Ethiopia, Somalia, Zimbabwe (all 2); Gambia, Iran, Tunisia, East Africa, Kenya, Sudan, Zambia, Vietnam  
54 (all one). Two refugees did not state their country of origin. The median age of the parents was 36  
55  
56  
57  
58  
59  
60

1  
2  
3 years (range 24-58 years) and all were born outside the UK. They had lived in the UK for a median of  
4 6.25 years. Eighteen had been awarded refugee status. One parent had been refused refugee  
5 status and was lodging an appeal. The remaining 31 were seeking asylum but their cases had not  
6 been heard as yet. Eighteen parents reported that they had a chronic illness (four chronic back pain,  
7 four depression, two diabetes, two disabilities and six other illnesses). Eighteen parents were  
8 employed, five did not state their occupation and 27 were unemployed (Table 1).  
9  
10

11  
12 The control group consisted of 50 parents of whom 44 were female. Twenty one parents declined to  
13 participate in the study. Their ages ranged from 19 to 46 years with a median age of 34.5 years.  
14 Most of the parents were fit and well but five reported health problems (three asthma and two  
15 depression/stress). Twenty six of the control parents were employed. As expected, the control group  
16 of parents had lived in the current locality for a longer period (17.5 vs 4.75 median years). Refugee  
17 parents were more likely to have health problems.  
18  
19  
20  
21  
22  
23  
24  
25  
26  
27

#### 28 *Access to health care and medicines*

29  
30 All families were registered with a GP. There was no significant difference in the number of days  
31 since the last visit to the GP (14 vs 15 days, refugees vs control). All but one of the refugee parents  
32 and all but five of the control group families had visited the GP in the past six months.  
33  
34

35  
36 There was a significant difference ( $p=0.008$ ) in that nine of the refugee parents stated that they had  
37 experienced difficulties visiting the GP in relation to affording the travel costs and language problems.  
38 None of the control group parents stated they had any difficulties.  
39  
40  
41  
42

#### 43 *Children's health*

44  
45  
46 There were 117 children in the refugee group and 99 in the control group. The median number of  
47 children per family was two in both groups ( $p=0.22$ ). The median ages of the children were five and  
48 four years respectively (refugees vs control). The interquartile ranges for ages of the children were  
49 2.25-8 and 1.9-8 years respectively in the two groups and there was no significant difference in the  
50 ages ( $p=0.13$ ). All but one child in the refugee group were immunised. Four children in the refugee  
51 group had chronic medical problems (congenital heart disease, asthma, cancer and poor growth).  
52 Seven children in the control group had chronic medical problems (asthma (4), epilepsy, ADHD and  
53 arthritis).  
54  
55  
56  
57  
58  
59  
60

1  
2  
3  
4 There were 29 refugee families and 30 control families with an ill child in the last month. In the last  
5 month 30 refugee children received 60 medicines and 31 control children received 63 medicines  
6 (Table 2 ). Paracetamol was the most frequently used medicine in both groups. The majority of the  
7 medicines for refugee children were prescribed (41 out of 60). In contrast, the majority of medicines  
8 for control children were OTC medicines (37 out of 63).  
9

10  
11  
12 In the last 6 months, all 50 refugee families and 45 control families had an ill child. In the last 6  
13 months, 48 refugee children received 108 medicines and 43 control children received 96 medicines  
14 (Table 3). ). Paracetamol was the most frequently used medicine in both groups .The majority of the  
15 medicines for refugee children were prescribed (83 out of 108). In contrast, the majority of the  
16 medicines for control children were OTC Medicines (52 out of 96).  
17  
18  
19

20  
21  
22 There was no difference between the two groups of children in relation to the likelihood of receiving  
23 any medicines in either the last month ( $P=0.839$ ) or the last 6 months ( $P=0.81$ ). Children in the  
24 refugee group were more likely to receive prescribed medicines for both the last month ( $p=0.008$ ) and  
25 the last six months ( $p<0.001$ ). They were also less likely to receive OTC medicines in the last 6  
26 months ( $P=0.009$ ). Analgesics/anti-pyretics were the most frequently used medicines in both the last  
27 month and the last six months (Table 2).  
28  
29  
30  
31  
32  
33  
34

### 35 Discussion

36  
37 Based on the answers given by the parents, child refugees were similar to the control group of children  
38 in relation to the presence of chronic medical problems and immunisation status. The main aim of  
39 this study was to compare the number of medicines used by refugee children in comparison with  
40 control children. It was reassuring to see that the total number of medicines used by both groups of  
41 children in both the past month and the past six months was similar. Alongside the fact that all  
42 families were registered with a GP suggests that refugee parents in this study were managing to  
43 access primary health care and ensure that their children receive adequate treatment. This is despite  
44 the difficulties in travel costs and language noted by refugee parents. Refugee children were, however,  
45 less likely to receive over the counter (OTC) medicines and more likely to receive prescribed  
46 medicines than control children.  
47  
48  
49  
50  
51

52  
53 A study in Dutch adolescents demonstrated that a higher socioeconomic status was associated with  
54 an increase in OTC drug use [16]. Similar findings were reported in German children and adolescents  
55 [17]. A study in the UK identified that the cost of OTCs affected only the most deprived sections of the  
56  
57  
58  
59  
60



1  
2  
3 population [18]. Refugees face considerable financial difficulties in that asylum seekers are not  
4 allowed to work and receive significantly less financial assistance than others on welfare benefits [19].  
5 Analgesics/antipyretics are the most frequently purchased OTC medicines by parents for children in  
6 the UK [18]. The two most common reasons for buying OTC medicines by British parents included; 1)  
7 not wishing to bother a GP for minor illness and 2) to have a medicine in case of future need [18]. It is  
8 likely that the lower OTC use in refugee children is related to the financial cost of OTC medicines.  
9  
10

11  
12 Parental recall of medicines administered to children over a 12 month period has been used by  
13 researchers in the UK and Australia [20,21]. We used two time periods- one month and six months in  
14 our pilot study. Parental recall for the last month is likely to be more accurate than for the six months.  
15 We were uncertain however whether a period of one month would generate enough data in relation  
16 to the number of medicines given. Based on our pilot study, we would recommend asking about a  
17 time period of one month only. We have showed that research in relation to access to medicine in  
18 refugee children is feasible by working in conjunction with Refugee Action. We have held discussions  
19 with other health professionals in the UK in order to plan larger studies. The data generated by our  
20 study will be used for the power calculations for these larger studies.  
21  
22  
23  
24  
25

26  
27 Adult refugees were more likely to have health problems than the control parents in this study. This is  
28 in keeping with previous studies as refugees often come from countries affected by armed conflict and  
29 are likely to have experienced bereavement, displacement or torture [19]. It is important to recognise  
30 that there are many differences in refugees worldwide and that the health problems of refugees from  
31 the Middle East in the UK are likely to be different to those of South-East Asian refugees in Canada  
32 [22].  
33  
34  
35

36  
37 There have been very few studies looking at access to health care by refugee children [23,24].  
38 Additionally, there have been no previous studies specifically looking at the pharmacoepidemiology of  
39 medicines received by refugee children. Our small study shows that it is possible to use both the  
40 number of medicines used by children over the last month or the last six months as a marker of  
41 access to health care. It is important to recognise the limitations of our study. Firstly, most of the  
42 refugees interviewed had been in contact with Refugee Action. These were refugees who had made  
43 contact with a charity and were therefore fully informed of their rights, especially with regards to health  
44 care. Unfortunately, due to government cutbacks, the Nottingham office of Refugee Action has now  
45 closed down and the nearest Refugee Action office is in Leicester, which is 40 km away. From April  
46 2014 Refugee Action no longer has a grant agreement with the Home Office to provide advice and  
47 support (formally One Stop Shop) to individuals and families going through the asylum system. This  
48 work is now provided through another agency; Migrant Help. Migrant Help services are split into  
49 Asylum Support Applications UK and Asylum Advice UK and are provided across the UK mainly  
50 through a national telephone service with some limited outreach (for the East Midlands in Derby,  
51 Nottingham and Leicester one day per week respectively). Refugee Action continue to provide a  
52  
53  
54  
55  
56  
57  
58  
59  
60

1  
2  
3 national Assisted Voluntary Returns project; Choices. A project for vulnerable destitute women in  
4 Leicester; Fresh Start and a volunteer run project for vulnerable people; Prevention of Asylum  
5 Homelessness which helps people to appeal refusals of support under s4 of the Immigration and  
6 Asylum Act 1999,  
7

8 It is also likely that if we had looked at a different group of children, for example refugee children  
9 presenting to the Emergency Department, our findings may have been different. A small study in  
10 Ireland of 25 refugees found that 20% of refugees were not registered with a GP [15]. Additionally,  
11 we did not look at the access to health care and medicines of refugee children held in immigration  
12 detention centres. Others have highlighted that these children experience significant health problems  
13 [25]. It was not possible to match controls and refugee parents by socio economic status . This is  
14 impossible in the UK as asylum seekers receive less financial support than others on welfare benefit  
15 [19]. Another limitation was the gender imbalance between refugees and controls.  
16

17 It is important to recognise that the number of people seeking refugee status in the UK is actually  
18 quite low (less than 20,000 in 2011)[26]. In May 2014 the Immigration Act received Royal Assent. One  
19 of the aims of the Act was to restrict access to public services and people entering the UK illegally.[27]  
20 It is uncertain whether this includes people who have been refused asylum. It is likely that in the  
21 future refugee children in the UK will experience more difficulties in accessing both health care and  
22 medicines.  
23  
24  
25  
26  
27

### 28 29 **Contributors**

30 IC conceived the original idea and study design. This was modified following discussion with  
31 SA,CM,HS,RH and KG. SA and JC performed the interviews and collected all the data. KG helped  
32 facilitate the collection of the data. Data was analysed by IC,RH,SA,JC,HS and KG. All authors  
33 contributed to the writing of the paper and approved the final manuscript.  
34  
35

36  
37 Competing interests

38 None  
39

### 40 41 **Funding**

42 This research received no specific grant from any funding agency in the public, commercial or not for  
43 profit sectors.  
44  
45

46  
47 Data sharing

48 No additional data available  
49  
50  
51  
52  
53  
54  
55  
56  
57  
58  
59  
60

**Table 1** Sociodemographics of parents

|                                      | <b>Refugee</b> | <b>Control</b> | <b>p-value</b> |
|--------------------------------------|----------------|----------------|----------------|
| Median age (y)                       | 36             | 34.5           | 0.12           |
| Male                                 | 38             | 6              | <0.001         |
| Ill health                           | 18             | 5              | 0.002          |
| Employed                             | 18             | 26             | 0.24           |
| No of years in current accommodation | 2.3            | 7.4            | <0.001         |
| No of years in current locality      | 4.8            | 17.5           | < 0.001        |

**Table 2** Medicines used in the last month

| Medicines          | Refugee    |           |           | Control    |           |           |
|--------------------|------------|-----------|-----------|------------|-----------|-----------|
|                    | Prescribed | OTC       | Total     | Prescribed | OTC       | Total     |
| Paracetamol        | 20         | 2         | <b>22</b> | 10         | 14        | <b>24</b> |
| Ibuprofen          | 2          | 0         | <b>2</b>  | 2          | 6         | <b>8</b>  |
| Antibiotics        | 7          | 0         | <b>7</b>  | 6          | 0         | <b>6</b>  |
| Inhalers           | 3          | 0         | <b>3</b>  | 5          | 0         | <b>5</b>  |
| Cough suppressants | 1          | 2         | <b>3</b>  | 3          | 1         | <b>4</b>  |
| Topical            | 0          | 0         | <b>0</b>  | 0          | 1         | <b>1</b>  |
| Vitamins           | 1          | 2         | <b>3</b>  | 0          | 10        | <b>10</b> |
| Teething medicines | 0          | 0         | <b>0</b>  | 0          | 3         | <b>3</b>  |
| Lactulose          | 2          | 0         | <b>2</b>  | 0          | 0         | <b>0</b>  |
| Honey              | 0          | 8         | <b>8</b>  | 0          | 0         | <b>0</b>  |
| Herbal             | 0          | 4         | <b>4</b>  | 0          | 1         | <b>1</b>  |
| Others             | 3          | 1         | <b>4</b>  | 0          | 1         | <b>1</b>  |
| Unknown            | 2          | 0         | <b>2</b>  | 0          | 0         | <b>0</b>  |
| <b>Total</b>       | <b>41</b>  | <b>19</b> | <b>60</b> | <b>26</b>  | <b>37</b> | <b>63</b> |

**Table 3** Medicines used in the last 6 months

| Medicines          | Refugee    |           |            | Control    |           |           |
|--------------------|------------|-----------|------------|------------|-----------|-----------|
|                    | Prescribed | OTC       | Total      | Prescribed | OTC       | Total     |
| Paracetamol        | 39         | 4         | <b>43</b>  | 19         | 23        | <b>42</b> |
| Ibuprofen          | 2          | 0         | <b>2</b>   | 2          | 10        | <b>12</b> |
| Antibiotics        | 10         | 0         | <b>10</b>  | 10         | 0         | <b>10</b> |
| Inhalers           | 4          | 0         | <b>4</b>   | 5          | 0         | <b>5</b>  |
| Cough suppressants | 6          | 2         | <b>8</b>   | 4          | 2         | <b>6</b>  |
| Topical            | 8          | 0         | <b>8</b>   | 2          | 1         | <b>3</b>  |
| Vitamins           | 2          | 2         | <b>4</b>   | 0          | 10        | <b>10</b> |
| Teething medicines | 0          | 1         | <b>1</b>   | 0          | 4         | <b>4</b>  |
| Lactulose          | 2          | 0         | <b>2</b>   | 0          | 0         | <b>0</b>  |
| Oral Rehydration   | 1          | 0         | <b>1</b>   | 2          | 1         | <b>3</b>  |
| Honey              | 0          | 8         | <b>8</b>   | 0          | 0         | <b>0</b>  |
| Herbal             | 0          | 5         | <b>5</b>   | 0          | 1         | <b>1</b>  |
| Others             | 2          | 3         | <b>5</b>   | 0          | 0         | <b>0</b>  |
| Unknown            | 4          | 0         | <b>4</b>   | 0          | 0         | <b>0</b>  |
| Iron               | 3          | 0         | <b>3</b>   | 0          | 0         | <b>0</b>  |
| <b>Total</b>       | <b>83</b>  | <b>25</b> | <b>108</b> | <b>44</b>  | <b>52</b> | <b>96</b> |

## References

1. Choonara I. Why children do not receive treatment. *Arch Dis Child* 2014;99:605-606
2. Bonati M, Choonara I, Hoppu K, Pons G, Seyberth H. Closing the gap in drug therapy. *Lancet* 1999; 353: 1625
3. Choonara I. Regulation of drugs for children in Europe. *BMJ* 2007; 335: 1221-1222
4. Berkovitch M, Choonara I, Jacqz-Aigrain E et al. Improving research and access to children's medicines worldwide. *Paed Perinat Drug Ther* 2008; 8: 138-139
5. Njuguna F, Mostert S, Slot A, et al. Abandonment of childhood cancer treatment in Western Kenya. *Arch Dis Child*. 2014; 99:609-614
6. UNICEF. The state of the world's children. Children with disabilities. New York 2013.
7. Pletcher M J, Kertesz S G, Kohn M A, Gonzales R. Trends in opioids prescribing by race/ethnicity for patients seeking care in US emergency departments. *JAMA* 2008; 299: 70-78.
8. Yen K, Kim M, Stremski E S, Gorelick M H. Effect of ethnicity and race on the use of pain medications in children with long bone fractures in the emergency department. *Ann Emerg Med* 2003; 42: 41-47.
9. Chen A Y, Chang R K R. Factors associated with prescription drug expenditures among children: an analysis of the medical expenditure panel survey. *Pediatrics* 2002; 109: 728-732.
10. Reime B, Tu A W, Lee S K, Canadian Neonatal Network. Treatment differences between Aboriginal and white infants admitted to Canadian neonatal intensive care units. *Paed Perinat Epidemiol* 2007; 21: 532-540.
11. Royal College of Paediatrics and Child Health. Inequalities in child health, 1998.
12. Arnold FW. Seeking medical justice. *BMJ* 2008; 336: 683-684.
13. Reeves M, de Wildt G, Murshali H et al. Access to health care for people seeking asylum in the UK. *B J Gen Pract* 2006; 56: 306-308.

- 1  
2  
3 14. Joels C. Impact of national policy on the health of people seeking asylum. *Nursing Standard*.  
4 2008;22: 35-40.  
5  
6  
7  
8 15. Delamothe T. Migrant healthcare: public health versus politics. *BMJ* 2012; 344: e924.  
9  
10  
11 16. Tobi H, Meijer WM, Tunistra J, de Jong-van den Berg LTW. Socio-economic differences in  
12 prescription and OTC drug use in Dutch adolescents. *Pharm World Sci* 2003; 25: 203-206.  
13  
14  
15 17. Du Y, Knopf H. Self-medication among children and adolescents in Germany: results of the  
16 National Health Survey for Children and Adolescents (KiGGS). *Br Clin Pharmacol* 2009; 68: 599-  
17 608.  
18  
19  
20  
21 18. McIntyre J, Conroy S, Collier J et al. Use of over-the-counter medicines in children. *Int J Pharm*  
22 *Pract* 2003; 11: 209-215.  
23  
24  
25  
26 19. Taylor K. Asylum seekers, refugees, and the politics of access to health care: a UK perspective.  
27 *Br J Gen Pract* 2009; 59: 765-772.  
28  
29  
30  
31  
32  
33 20. Headley J, Northstone K. Medication administered to children from 0 to 7.5 years in the Avon  
34 Longitudinal Study of Parents and Children (ALSPAC). *Eur J Clin Pharmacol* 2007; 63:189-195  
35  
36  
37  
38 21. Trajanovska M, Mniac E, Cranswick N, Johnston L. Use of over the-counter medicines for young  
39 children in Australia. *Journal of Paediatrics and Child Health* 2010. 46; 5-9.  
40  
41  
42 22. Fung K, Wong Y-LR. Factors influencing attitudes towards seeking professional help among East  
43 and Southeast Asian immigrant and refugee women. *Int J Soc Psychiatry* 2007; 53: 216-231.  
44  
45 23. Davidson N, Skull S, Burgner D et al. An issue of access: delivering equitable health care for  
46 newly arrived refugee children in Australia. *J Paediatr Child Health* 2004; 40: 569-575.  
47  
48  
49 24. Prendiville T, Williamson M, Cahill P, Loftus BG. Access of asylum seeker children to acute  
50 paediatric services. *Ir Med J* 2007; 100: 362-363.  
51  
52  
53  
54  
55  
56  
57  
58  
59  
60

- 1  
2  
3 25. Lorek A, Ehntholt K, Nesbitt A et al. The mental and physical health difficulties of children held  
4 within a British immigration detention center: a pilot study. *Child Abuse Neglect* 2009; 33: 573-  
5 585.  
6  
7  
8  
9 26. Blinder S. Briefing: Migration to the UK: Asylum, published 13/02/2013.  
10 [www.migrationobservatory.ox.ac.uk](http://www.migrationobservatory.ox.ac.uk) (accessed 12 March 2013)  
11  
12  
13 27. [www.gov.uk](http://www.gov.uk) Plans to encourage the recovery of migrant NHS healthcare costs (accessed 25  
14 November 2014).  
15  
16  
17  
18  
19  
20  
21  
22  
23  
24  
25  
26  
27  
28  
29  
30  
31  
32  
33  
34  
35  
36  
37  
38  
39  
40  
41  
42  
43  
44  
45  
46  
47  
48  
49  
50  
51  
52  
53  
54  
55  
56  
57  
58  
59  
60



1  
2  
3 **Access to medicines by child refugees in the East Midlands region of**  
4 **England – a cross-sectional study**  
5

6 Alkahtani S<sup>1</sup>, Cherrill J<sup>1</sup>, Millward C<sup>2</sup>, Grayson K<sup>3</sup>, Hilliam R<sup>4</sup>, Sammons H<sup>1</sup>, Choonara I<sup>1</sup>  
7  
8  
9

10 <sup>1</sup>Academic Division of Child Health, University of Nottingham, Derbyshire Children's Hospital, Derby  
11 UK  
12

13  
14 <sup>2</sup>Department of Clinical Psychology, Derbyshire Children's Hospital, Derby UK  
15  
16

17  
18 <sup>3</sup>Refugee Action, Chancery House, 7 Millstone Lane, Leicester, LE1 5JN, UK  
19

20 <sup>4</sup>Statistics Lecturer, The Open University, Walton Hall, Milton Keynes, MK7 6AA, UK  
21  
22  
23  
24  
25

26 Corresponding author

27 Imti Choonara

28 Emeritus Professor in Child Health

29 Academic Division of Child Health

30 The Medical School

31 University of Nottingham

32 Derbyshire Children's Hospital

33 Uttoxeter Road

34 Derby DE22 3DT  
35  
36  
37  
38  
39  
40  
41  
42  
43  
44  
45  
46  
47  
48  
49  
50  
51  
52  
53  
54  
55  
56  
57  
58  
59  
60

## Abstract

*Objectives:* To explore access to primary health care and drug therapy by refugee children in the East Midlands region of England.

*Design:* Interviews with refugees with children and a control group of British parents with children.

*Setting:* East Midlands region of England

*Participants:* 50 refugees with children and a control group of 50 parents with children.

*Main outcome measures:* Number of medicines used by children in the last month and the last six months. Health of parents and children. Registration with a GP.

*Results:* All families in both groups were registered with a GP. There was no difference in the number of children in the two groups experiencing illnesses. In the last month, 30 refugee children received 60 medicines and 31 control children 63 medicines. In the last 6 months, 48 refugee children received 108 medicines and 43 control children 96 medicines. There was no difference between the two groups of children in relation to the likelihood of receiving any medicines in either the last month ( $P=0.839$ ) or the last 6 months ( $P=0.81$ ). Children in the refugee group were more likely to receive prescribed medicines for both the last month ( $p=0.008$ ) and the last six months ( $p<0.001$ ). They were also less likely to receive OTC medicines in the last 6 months ( $P=0.009$ ).

*Conclusions:* The refugee children in this study in the East Midlands had access to primary health care, medicines and a family doctor. They were more likely to receive prescribed medicines and less likely to receive OTC medicines, especially paracetamol.

Keywords: access, medicines, refugees, OTC medicines

### Article Summary:

#### *Strengths and limitations of this study*

- Study in refugee children – a vulnerable group
- The number of medicines used by children as a marker of access to primary healthcare
- The refugee families all had contact with a charity dealing with refugees.

## Introduction

The right to access healthcare is included in the Universal Declaration of Human Rights by the United Nations [1]. Children have the right to access health care and receive medicines that are scientifically evaluated for both efficacy and safety [2,3]. Research has mainly focused on clinical trials that have evaluated efficacy. Access is an area that has been inadequately explored [4]. Problems with access to health care and medicines are well recognised in low and lower middle income countries. The lack of free universal healthcare in many countries results in people being unable to afford consultations with health professionals, unnecessary investigations and medical treatment [1,5]. Only one in four children with diarrhoea in India receive treatment with oral rehydration salts [1,6]. More recent research in North America has revealed that in both the United States and Canada, children of different ethnic groups or without insurance may be less likely to receive medicines [7-10].

Refugee children are a highly vulnerable group of children who are less likely to receive full access to medicines and health care [11]. Adult refugees are likely to experience significant problems in accessing health care and medical treatment [11-13]. In the UK all refugees are entitled to access primary healthcare, which includes registering with a GP [14]. However concern has been raised that both refugees and health professionals are confused about what is available and refugees may not register with a GP because they are unaware that they have that right [14,15].

There have been relatively few studies looking at access to health care for refugee children in the UK and to date there have been no studies in the UK on whether these children receive satisfactory drug therapy. We have used the term 'refugees' to include both those who have been awarded refugee status and those seeking asylum. The aim was to explore access to health care and drug therapy in this vulnerable group of children.

## Methods

Ethical approval was obtained from the University of Nottingham Medical School Research Ethics Committee (Reference G/6/2010). Initial contact with both asylum seekers and refugees was made by Refugee Action (Nottingham branch). All refugees attending a Refugee Action appointment were asked if they had children and if they would be interested in participating in the research. Those parents, who Refugee Action staff identified as possibly being interested in participating in the research, were approached by the research investigators (SA and JC). Parents who then agreed to take part in the study were interviewed within a private room in the offices provided by Refugee Action in Nottingham. Written informed consent was obtained. If the participants did not speak/understand English/Arabic, then an interpreting service was used. Additional interviews were performed at a refugee drop in centre and a Muslim community centre in Derby, by one of the researchers (SA).

1  
2  
3 Again refugees were asked if they had children and if they would be interested in participating in the  
4 research. The interview involved collecting the following data, using a questionnaire (see Appendix 1).

- 5 a) demographic data regarding age and number of children  
6  
7 b) data regarding health of the family, children, registration with the GP and immunisation status  
8 of the children  
9  
10 c) whether any of the children had been ill in the last month and if they had received any  
11 medicines, if so, from whom  
12  
13 d) similar questions regarding illness and number of medicines for the last six months

14 The interviews were performed between November 2010 and November 2011.

15  
16  
17  
18 A control group of parents were obtained in a local shopping centre. The investigators wore University  
19 t-shirts and ID badges and were provided with a quiet area with seating within the shopping centre.  
20  
21 Adults in the shopping centre were approached by the investigators and asked two questions : (1) Did  
22 they have children? (2) Were they British? If they answered yes to both questions and written  
23 informed consent was given, the interview was performed within the quiet seated area. Interviews  
24 with the control group of parents were performed between November 2011 and January 2012.  
25 Interviews took 10-20 minutes and the same questions were asked as for the refugee group.  
26  
27  
28  
29

30  
31 Statistical analysis was performed by using the Mann Whitney test for demographic data. The Chi-  
32 Squared test was used to compare the proportion of children with illness, and the proportion of  
33 children receiving medicines (both prescribed and OTC). It was not possible to perform a power  
34 calculation to determine the sample size as there was insufficient information available regarding the  
35 number of medicines used by children in the UK. It was therefore decided to aim for 50 parents in  
36 each group. This was a pragmatic decision based on discussions with Refugee Action. The research  
37 was performed as a pilot study in order to test the feasibility of parents recalling such information and  
38 in order to obtain pharmacoepidemiological data that would be useful for power calculations for  
39 subsequent national studies.  
40  
41  
42  
43  
44  
45

## 46 Results

47  
48 Sixty six parents of children who were refugees/asylum seekers were invited to participate. Sixteen  
49 declined (reasons not given for declining), i.e. 50 agreed to participate. Thirty eight of the 50 parents  
50 who agreed to participate were male. Most refugees were from Iraq(20), Pakistan(6), Afghanistan(4)  
51 and Nigeria(4). There were one to two refugees from each of the following countries –  
52 Ethiopia, Somalia, Zimbabwe (all 2); Gambia, Iran, Tunisia, East Africa, Kenya, Sudan, Zambia, Vietnam  
53 (all one). Two refugees did not state their country of origin. The median age of the parents was 36  
54  
55  
56  
57  
58  
59  
60

1  
2  
3 years (range 24-58 years) and all were born outside the UK. They had lived in the UK for a median of  
4 6.25 years. Eighteen had been awarded refugee status. One parent had been refused refugee  
5 status and was lodging an appeal. The remaining 31 were seeking asylum but their cases had not  
6 been heard as yet. Eighteen parents reported that they had a chronic illness (four chronic back pain,  
7 four depression, two diabetes, two disabilities and six other illnesses). Eighteen parents were  
8 employed, five did not state their occupation and 27 were unemployed (Table 1).  
9  
10

11  
12 The control group consisted of 50 parents of whom 44 were female. Twenty one parents declined to  
13 participate in the study. Their ages ranged from 19 to 46 years with a median age of 34.5 years.  
14 Most of the parents were fit and well but five reported health problems (three asthma and two  
15 depression/stress). Twenty six of the control parents were employed. As expected, the control group  
16 of parents had lived in the current locality for a longer period (17.5 vs 4.75 median years). Refugee  
17 parents were more likely to have health problems.  
18  
19  
20  
21  
22  
23  
24  
25  
26  
27

#### 28 *Access to health care and medicines*

29  
30 All families were registered with a GP. There was no significant difference in the number of days  
31 since the last visit to the GP (14 vs 15 days, refugees vs control). All but one of the refugee parents  
32 and all but five of the control group families had visited the GP in the past six months.  
33  
34

35  
36 There was a significant difference ( $p=0.008$ ) in that nine of the refugee parents stated that they had  
37 experienced difficulties visiting the GP in relation to affording the travel costs and language problems.  
38 None of the control group parents stated they had any difficulties.  
39  
40  
41  
42

#### 43 *Children's health*

44  
45  
46 There were 117 children in the refugee group and 99 in the control group. The median number of  
47 children per family was two in both groups ( $p=0.22$ ). The median ages of the children were five and  
48 four years respectively (refugees vs control). The interquartile ranges for ages of the children were  
49 2.25-8 and 1.9-8 years respectively in the two groups and there was no significant difference in the  
50 ages ( $p=0.13$ ). All but one child in the refugee group were immunised. Four children in the refugee  
51 group had chronic medical problems (congenital heart disease, asthma, cancer and poor growth).  
52 Seven children in the control group had chronic medical problems (asthma (4), epilepsy, ADHD and  
53 arthritis).  
54  
55  
56  
57  
58  
59  
60

1  
2  
3  
4 There were 29 refugee families and 30 control families with an ill child in the last month. In the last  
5 month 30 refugee children received 60 medicines and 31 control children received 63 medicines  
6 (Table 2 ). Paracetamol was the most frequently used medicine in both groups. The majority of the  
7 medicines for refugee children were prescribed (41 out of 60). In contrast, the majority of medicines  
8 for control children were OTC medicines (37 out of 63).  
9

10  
11  
12 In the last 6 months, all 50 refugee families and 45 control families had an ill child. In the last 6  
13 months, 48 refugee children received 108 medicines and 43 control children received 96 medicines  
14 (Table 3). ). Paracetamol was the most frequently used medicine in both groups .The majority of the  
15 medicines for refugee children were prescribed (83 out of 108). In contrast, the majority of the  
16 medicines for control children were OTC Medicines (52 out of 96).  
17  
18  
19

20  
21  
22 There was no difference between the two groups of children in relation to the likelihood of receiving  
23 any medicines in either the last month ( $P=0.839$ ) or the last 6 months ( $P=0.81$ ). Children in the  
24 refugee group were more likely to receive prescribed medicines for both the last month ( $p=0.008$ ) and  
25 the last six months ( $p<0.001$ ). They were also less likely to receive OTC medicines in the last 6  
26 months ( $P=0.009$ ). Analgesics/anti-pyretics were the most frequently used medicines in both the last  
27 month and the last six months (Table 2).  
28  
29  
30  
31  
32  
33  
34

### 35 Discussion

36  
37 Based on the answers given by the parents, child refugees were similar to the control group of children  
38 in relation to the presence of chronic medical problems and immunisation status. The main aim of  
39 this study was to compare the number of medicines used by refugee children in comparison with  
40 control children. It was reassuring to see that the total number of medicines used by both groups of  
41 children in both the past month and the past six months was similar. Alongside the fact that all  
42 families were registered with a GP suggests that refugee parents in this study were managing to  
43 access primary health care and ensure that their children receive adequate treatment. This is despite  
44 the difficulties in travel costs and language noted by refugee parents. Refugee children were, however,  
45 less likely to receive over the counter (OTC) medicines and more likely to receive prescribed  
46 medicines than control children.  
47  
48  
49  
50  
51

52  
53 A study in Dutch adolescents demonstrated that a higher socioeconomic status was associated with  
54 an increase in OTC drug use [16]. Similar findings were reported in German children and adolescents  
55 [17]. A study in the UK identified that the cost of OTCs affected only the most deprived sections of the  
56  
57  
58  
59  
60

1  
2  
3 population [18]. Refugees face considerable financial difficulties in that asylum seekers are not  
4 allowed to work and receive significantly less financial assistance than others on welfare benefits [19].  
5 Analgesics/antipyretics are the most frequently purchased OTC medicines by parents for children  
6 in the UK [18]. The two most common reasons for buying OTC medicines by British parents included; 1)  
7 not wishing to bother a GP for minor illness and 2) to have a medicine in case of future need [18]. It is  
8 likely that the lower OTC use in refugee children is related to the financial cost of OTC medicines.  
9  
10

11  
12 Parental recall of medicines administered to children over a 12 month period has been used by  
13 researchers in the UK and Australia [20,21]. We used two time periods- one month and six months in  
14 our pilot study. Parental recall for the last month is likely to be more accurate than for the six months.  
15 We were uncertain however whether a period of one month would generate enough data in relation  
16 to the number of medicines given. Based on our pilot study, we would recommend asking about a  
17 time period of one month only. We have showed that research in relation to access to medicine in  
18 refugee children is feasible by working in conjunction with Refugee Action. We have held discussions  
19 with other health professionals in the UK in order to plan larger studies. The data generated by our  
20 study will be used for the power calculations for these larger studies.  
21  
22  
23  
24  
25

26  
27 Adult refugees were more likely to have health problems than the control parents in this study. This is  
28 in keeping with previous studies as refugees often come from countries affected by armed conflict and  
29 are likely to have experienced bereavement, displacement or torture [19]. It is important to recognise  
30 that there are many differences in refugees worldwide and that the health problems of refugees from  
31 the Middle East in the UK are likely to be different to those of South-East Asian refugees in Canada  
32 [22].  
33  
34  
35

36  
37 There have been very few studies looking at access to health care by refugee children [23,24].  
38 Additionally, there have been no previous studies specifically looking at the pharmacoepidemiology of  
39 medicines received by refugee children. Our small study shows that it is possible to use both the  
40 number of medicines used by children over the last month or the last six months as a marker of  
41 access to health care. It is important to recognise the limitations of our study. Firstly, most of the  
42 refugees interviewed had been in contact with Refugee Action. These were refugees who had made  
43 contact with a charity and were therefore fully informed of their rights, especially with regards to health  
44 care. Unfortunately, due to government cutbacks, the Nottingham office of Refugee Action has now  
45 closed down and the nearest Refugee Action office is in Leicester, which is 40 km away. From April  
46 2014 Refugee Action no longer has a grant agreement with the Home Office to provide advice and  
47 support (formally One Stop Shop) to individuals and families going through the asylum system. This  
48 work is now provided through another agency; Migrant Help. Migrant Help services are split into  
49 Asylum Support Applications UK and Asylum Advice UK and are provided across the UK mainly  
50 through a national telephone service with some limited outreach (for the East Midlands in Derby,  
51 Nottingham and Leicester one day per week respectively). Refugee Action continue to provide a  
52  
53  
54  
55  
56  
57  
58  
59  
60

1  
2  
3 national Assisted Voluntary Returns project; Choices. A project for vulnerable destitute women in  
4 Leicester; Fresh Start and a volunteer run project for vulnerable people; Prevention of Asylum  
5 Homelessness which helps people to appeal refusals of support under s4 of the Immigration and  
6 Asylum Act 1999,  
7

8 It is also likely that if we had looked at a different group of children, for example refugee children  
9 presenting to the Emergency Department, our findings may have been different. A small study in  
10 Ireland of 25 refugees found that 20% of refugees were not registered with a GP [15]. Additionally,  
11 we did not look at the access to health care and medicines of refugee children held in immigration  
12 detention centres. Others have highlighted that these children experience significant health problems  
13 [25]. It was not possible to match controls and refugee parents by socio economic status . This is  
14 impossible in the UK as asylum seekers receive less financial support than others on welfare benefit  
15 [19]. Another limitation was the gender imbalance between refugees and controls.  
16

17 It is important to recognise that the number of people seeking refugee status in the UK is actually  
18 quite low (less than 20,000 in 2011)[26]. In May 2014 the Immigration Act received Royal Assent. One  
19 of the aims of the Act was to restrict access to public services and people entering the UK illegally.[27]  
20 It is uncertain whether this includes people who have been refused asylum. It is likely that in the  
21 future refugee children in the UK will experience more difficulties in accessing both health care and  
22 medicines.  
23  
24  
25  
26  
27

### 28 29 **Contributors**

30 IC conceived the original idea and study design. This was modified following discussion with  
31 SA,CM,HS,RH and KG. SA and JC performed the interviews and collected all the data. KG helped  
32 facilitate the collection of the data. Data was analysed by IC,RH,SA,JC,HS and KG. All authors  
33 contributed to the writing of the paper and approved the final manuscript.  
34  
35

36  
37 Competing interests

38 None  
39

### 40 41 **Funding**

42 This research received no specific grant from any funding agency in the public, commercial or not for  
43 profit sectors.  
44  
45

46  
47 Data sharing

48 No additional data available  
49  
50  
51  
52  
53  
54  
55  
56  
57  
58  
59  
60



**Table 1** Sociodemographics of parents

|                                      | <b>Refugee</b> | <b>Control</b> | <b>p-value</b> |
|--------------------------------------|----------------|----------------|----------------|
| Median age (y)                       | 36             | 34.5           | 0.12           |
| Male                                 | 38             | 6              | <0.001         |
| Ill health                           | 18             | 5              | 0.002          |
| Employed                             | 18             | 26             | 0.24           |
| No of years in current accommodation | 2.3            | 7.4            | <0.001         |
| No of years in current locality      | 4.8            | 17.5           | < 0.001        |

**Table 2** Medicines used in the last month

| Medicines          | Refugee    |           |           | Control    |           |           |
|--------------------|------------|-----------|-----------|------------|-----------|-----------|
|                    | Prescribed | OTC       | Total     | Prescribed | OTC       | Total     |
| Paracetamol        | 20         | 2         | <b>22</b> | 10         | 14        | <b>24</b> |
| Ibuprofen          | 2          | 0         | <b>2</b>  | 2          | 6         | <b>8</b>  |
| Antibiotics        | 7          | 0         | <b>7</b>  | 6          | 0         | <b>6</b>  |
| Inhalers           | 3          | 0         | <b>3</b>  | 5          | 0         | <b>5</b>  |
| Cough suppressants | 1          | 2         | <b>3</b>  | 3          | 1         | <b>4</b>  |
| Topical            | 0          | 0         | <b>0</b>  | 0          | 1         | <b>1</b>  |
| Vitamins           | 1          | 2         | <b>3</b>  | 0          | 10        | <b>10</b> |
| Teething medicines | 0          | 0         | <b>0</b>  | 0          | 3         | <b>3</b>  |
| Lactulose          | 2          | 0         | <b>2</b>  | 0          | 0         | <b>0</b>  |
| Honey              | 0          | 8         | <b>8</b>  | 0          | 0         | <b>0</b>  |
| Herbal             | 0          | 4         | <b>4</b>  | 0          | 1         | <b>1</b>  |
| Others             | 3          | 1         | <b>4</b>  | 0          | 1         | <b>1</b>  |
| Unknown            | 2          | 0         | <b>2</b>  | 0          | 0         | <b>0</b>  |
| <b>Total</b>       | <b>41</b>  | <b>19</b> | <b>60</b> | <b>26</b>  | <b>37</b> | <b>63</b> |

**Table 3** Medicines used in the last 6 months

| Medicines          | Refugee    |           |            | Control    |           |           |
|--------------------|------------|-----------|------------|------------|-----------|-----------|
|                    | Prescribed | OTC       | Total      | Prescribed | OTC       | Total     |
| Paracetamol        | 39         | 4         | <b>43</b>  | 19         | 23        | <b>42</b> |
| Ibuprofen          | 2          | 0         | <b>2</b>   | 2          | 10        | <b>12</b> |
| Antibiotics        | 10         | 0         | <b>10</b>  | 10         | 0         | <b>10</b> |
| Inhalers           | 4          | 0         | <b>4</b>   | 5          | 0         | <b>5</b>  |
| Cough suppressants | 6          | 2         | <b>8</b>   | 4          | 2         | <b>6</b>  |
| Topical            | 8          | 0         | <b>8</b>   | 2          | 1         | <b>3</b>  |
| Vitamins           | 2          | 2         | <b>4</b>   | 0          | 10        | <b>10</b> |
| Teething medicines | 0          | 1         | <b>1</b>   | 0          | 4         | <b>4</b>  |
| Lactulose          | 2          | 0         | <b>2</b>   | 0          | 0         | <b>0</b>  |
| Oral Rehydration   | 1          | 0         | <b>1</b>   | 2          | 1         | <b>3</b>  |
| Honey              | 0          | 8         | <b>8</b>   | 0          | 0         | <b>0</b>  |
| Herbal             | 0          | 5         | <b>5</b>   | 0          | 1         | <b>1</b>  |
| Others             | 2          | 3         | <b>5</b>   | 0          | 0         | <b>0</b>  |
| Unknown            | 4          | 0         | <b>4</b>   | 0          | 0         | <b>0</b>  |
| Iron               | 3          | 0         | <b>3</b>   | 0          | 0         | <b>0</b>  |
| <b>Total</b>       | <b>83</b>  | <b>25</b> | <b>108</b> | <b>44</b>  | <b>52</b> | <b>96</b> |

## References

1. Choonara I. Why children do not receive treatment. *Arch Dis Child* 2014;99:605-606
2. Bonati M, Choonara I, Hoppu K, Pons G, Seyberth H. Closing the gap in drug therapy. *Lancet* 1999; 353: 1625
3. Choonara I. Regulation of drugs for children in Europe. *BMJ* 2007; 335: 1221-1222
4. Berkovitch M, Choonara I, Jacqz-Aigrain E et al. Improving research and access to children's medicines worldwide. *Paed Perinat Drug Ther* 2008; 8: 138-139
5. Njuguna F, Mostert S, Slot A, et al. Abandonment of childhood cancer treatment in Western Kenya. *Arch Dis Child*. 2014; 99:609-614
6. UNICEF. The state of the world's children. Children with disabilities. New York 2013.
7. Pletcher M J, Kertesz S G, Kohn M A, Gonzales R. Trends in opioids prescribing by race/ethnicity for patients seeking care in US emergency departments. *JAMA* 2008; 299: 70-78.
8. Yen K, Kim M, Stremski E S, Gorelick M H. Effect of ethnicity and race on the use of pain medications in children with long bone fractures in the emergency department. *Ann Emerg Med* 2003; 42: 41-47.
9. Chen A Y, Chang R K R. Factors associated with prescription drug expenditures among children: an analysis of the medical expenditure panel survey. *Pediatrics* 2002; 109: 728-732.
10. Reime B, Tu A W, Lee S K, Canadian Neonatal Network. Treatment differences between Aboriginal and white infants admitted to Canadian neonatal intensive care units. *Paed Perinat Epidemiol* 2007; 21: 532-540.
11. Royal College of Paediatrics and Child Health. Inequalities in child health, 1998.
12. Arnold FW. Seeking medical justice. *BMJ* 2008; 336: 683-684.
13. Reeves M, de Wildt G, Murshali H et al. Access to health care for people seeking asylum in the UK. *B J Gen Pract* 2006; 56: 306-308.

- 1  
2  
3 14. Joels C. Impact of national policy on the health of people seeking asylum. *Nursing Standard*.  
4 2008;22: 35-40.  
5  
6
- 7 15. Delamothe T. Migrant healthcare: public health versus politics. *BMJ* 2012; 344: e924.  
8  
9
- 10 16. Tobi H, Meijer WM, Tunistra J, de Jong-van den Berg LTW. Socio-economic differences in  
11 prescription and OTC drug use in Dutch adolescents. *Pharm World Sci* 2003; 25: 203-206.  
12  
13
- 14 17. Du Y, Knopf H. Self-medication among children and adolescents in Germany: results of the  
15 National Health Survey for Children and Adolescents (KiGGS). *Br Clin Pharmacol* 2009; 68:  
16 599-608.  
17  
18
- 19 18. McIntyre J, Conroy S, Collier J et al. Use of over-the-counter medicines in children. *Int J*  
20 *Pharm Pract* 2003; 11: 209-215.  
21  
22
- 23 19. Taylor K. Asylum seekers, refugees, and the politics of access to health care: a UK  
24 perspective. *Br J Gen Pract* 2009; 59: 765-772.  
25  
26
- 27 20. Headley J, Northstone K. Medication administered to children from 0 to 7.5 years in the Avon  
28 Longitudinal Study of Parents and Children (ALSPAC). *Eur J Clin Pharmacol* 2007; 63:189-  
29 195.  
30  
31
- 32 21. Trajanovska M, Mniac E, Cranswick N, Johnston L. Use of over the-counter medicines for  
33 young children in Australia. *Journal of Paediatrics and Child Health* 2010. 46; 5-9.  
34  
35
- 36 22. Fung K, Wong Y-LR. Factors influencing attitudes towards seeking professional help among  
37 East and Southeast Asian immigrant and refugee women. *Int J Soc Psychiatry* 2007; 53:  
38 216-231.  
39
- 40 23. Davidson N, Skull S, Burgner D et al. An issue of access: delivering equitable health care for  
41 newly arrived refugee children in Australia. *J Paediatr Child Health* 2004; 40: 569-575.  
42  
43
- 44 24. Prendiville T, Williamson M, Cahill P, Loftus BG. Access of asylum seeker children to acute  
45 paediatric services. *Ir Med J* 2007; 100: 362-363.  
46  
47  
48  
49  
50  
51  
52  
53  
54  
55  
56  
57  
58  
59  
60

- 1  
2  
3 25. Lorek A, Ehntholt K, Nesbitt A et al. The mental and physical health difficulties of children  
4 held within a British immigration detention center: a pilot study. *Child Abuse Neglect* 2009; 33:  
5 573-585.  
6  
7  
8  
9 26. Blinder S. Briefing: Migration to the UK: Asylum, published 13/02/2013.  
10 [www.migrationobservatory.ox.ac.uk](http://www.migrationobservatory.ox.ac.uk) (accessed 12 March 2013)  
11  
12  
13  
14 27. [www.gov.uk](http://www.gov.uk) Plans to encourage the recovery of migrant NHS healthcare costs (accessed 25  
15 November 2014).  
16  
17  
18  
19  
20  
21  
22  
23  
24  
25  
26  
27  
28  
29  
30  
31  
32  
33  
34  
35  
36  
37  
38  
39  
40  
41  
42  
43  
44  
45  
46  
47  
48  
49  
50  
51  
52  
53  
54  
55  
56  
57  
58  
59  
60

# Children's Access to Medicines in the East Midlands Parental interview

## A. BACKGROUND

Age (years): ..... Male / Female

No. of adults living in the home: .....

No. of children: .....

Age of children: .....

Occupation: .....

Country of birth: .....

*If applicable*

Country left: .....

Reasons for leaving: .....

Date of entry to the UK: .....

Have you had a decision on your asylum claim: .....

Duration of time in present accommodation: .....

Duration of time in current locality: .....

Contacts in current locality: .....

Links with community:  
.....

## B. HEALTH

Are you registered with a GP?

Yes  No

If no, why is that?  
.....

Date of last visit to GP: .....

Are you well?

Yes  No

**Are you on any medicines?**

Yes  No

If so, which medicine and from whom do you obtain the medicine?

.....  
.....  
.....  
.....

**Are your children normally fit and well?**

Yes  No

If not, please give details.

.....  
.....

**What do you normally do when your child is unwell?**

.....  
.....  
.....

**Have your children received their immunisations?**

Yes  No

If so, which?

.....  
.....

**C. LAST MONTH**

**Have any of the children been ill in the last month?**

Yes  No

If so, have they seen a health professional? If so, state which type?

.....  
.....  
.....

**Have any of your children received any medicines in the last month?**

Yes  No

If so, which medicines?

.....  
.....

1  
2  
3  
4  
5  
6  
7  
8  
9  
10  
11  
12  
13  
14  
15  
16  
17  
18  
19  
20  
21  
22  
23  
24  
25  
26  
27  
28  
29  
30  
31  
32  
33  
34  
35  
36  
37  
38  
39  
40  
41  
42  
43  
44  
45  
46  
47  
48  
49  
50  
51  
52  
53  
54  
55  
56  
57  
58  
59  
60



Were the medicines prescribed and, if so, by whom?

.....

Where did you get the medicines from?

.....

Did you have to pay for the medicines?

Yes  No

.....

Were there any difficulties in obtaining the medicines? (Include travel costs)

Yes  No

.....

.....

Have any of your children received any medicines (including herbal or homeopathic remedies) in the last month that you have bought from a chemist or obtained from any other individual?

Yes  No

If so, which medicines and from whom?

.....

.....

**D. LAST SIX MONTHS**

Have any of the children been ill in the last six months?

Yes  No

If so, have they seen a health professional? If so, state which type?

.....

.....

.....

Have any of your children received any medicines in the last six months?

Yes  No

If so, which medicines?

.....

.....

Were the medicines prescribed and, if so, by whom?

.....

Where did you get the medicines from?

.....

Did you have to pay for the medicines?

Yes  No

.....

Were there any difficulties in obtaining the medicines? (Include travel costs)

Yes  No

.....

Have any of your children received any medicines (including herbal or homeopathic remedies) in the last six months that you have bought from a chemist or obtained from any other individual?

Yes  No

If so, which medicines and from whom?

.....

.....

1  
2  
3  
4  
5  
6  
7  
8  
9  
10  
11  
12  
13  
14  
15  
16  
17  
18  
19  
20  
21  
22  
23  
24  
25  
26  
27  
28  
29  
30  
31  
32  
33  
34  
35  
36  
37  
38  
39  
40  
41  
42  
43  
44  
45  
46  
47  
48  
49  
50  
51  
52  
53  
54  
55  
56  
57  
58  
59  
60
